# Supplementary material for: Raptors bred in captivity: semen characteristics and assisted reproduction outcome in goshawk (Accipiter gentilis)
Source: PeerJ. 2023 Mar 22;11:e15094. doi: 10.7717/peerj.15094 (PMC10039655; doi:10.7717/peerj.15094)
Supplement: Supplemental Information 1 — All data related to the semen parameters analysed for the three males (A, B and C) during the three consecutive reproductive seasons (2012–2014): volume, sperm concentration, sperm motility, live sperms and the rate of motile/immotile and live/death sperms. [file peerj-11-15094-s001.xlsx]

## Sheet: SAS results 
‘Hawk test Age and Month(age), including Year of sampling as covariates, and temporal trends as autoregressive of the first order’						Model applied
The GLIMMIX Procedure						proc glimmix data=work.Hawk;
						title ‘Hawk test Age and Month(age), including Year of sampling as covariates, and temporal trends as autoregressive of the first order’;
Model Information						class ID Month Year age;
Data Set	WORK.HAWK					model VARIABLE = age Month(age) / DDFM=KR;
Response Variable	vol					random age / type=ar(1) subject=ID;
Response Distribution	Gaussian					random Year / type=ar(1) subject=ID;
Link Function	Identity					random ID;
Variance Function	Default					LSMEANS age Month(age) / ADJDFE=ROW adjust=tukey pdiff lines;
Variance Matrix	Not blocked					run;
Estimation Technique	Restricted Maximum Likelihood					quit;
Degrees of Freedom Method	Kenward-Roger
Fixed Effects SE Adjustment	Kenward-Roger
Class Level Information
Class	Levels	Values
ID	3	A B C
Month	3	3 4 5
Year	3	2012 2013 2014
age	5	5 6 7 8 9
Number of Observations Read	172
Number of Observations Used	172
Dimensions
G-side Cov. Parameters	5
R-side Cov. Parameters	1
Columns in X	21
Columns in Z	27
Subjects (Blocks in V)	1
Max Obs per Subject	172
Optimization Information
Optimization Technique	Dual Quasi-Newton
Parameters in Optimization	5
Lower Boundaries	5
Upper Boundaries	2
Fixed Effects	Profiled
Residual Variance	Profiled
Starting From	Data
Iteration History
Iteration	Restarts	Evaluations	Objective	Change	Max
			Function		Gradient
0	0	4	1103.42	.	1.76589
1	0	4	1100.68	2.73867	25.8771
2	0	2	1100.48	0.20533	9.45131
3	0	2	1100.26	0.213897	6.8053
4	0	3	1100.25	0.0172147	2.11373
5	0	2	1100.23	0.0187001	1.29045
6	0	2	1100.22	0.00422	2.48641
7	0	2	1100.22	0.00345364	0.380529
8	1	7	1100.22	0.00011899	0.036867
9	1	3	1100.22	2.9e-07	0.036867
10	1	2	1100.22	0.00072255	0.98019
11	1	4	1100.21	0.00600588	1.47087
12	2	7	1100.21	0.00104529	0.112913
13	2	3	1100.21	8.4e-07	0.112894
14	2	3	1100.21	7.26e-06	0.00185
15	2	3	1100.21	3.88e-06	0.000624
Convergence criterion (GCONV=1E-8) satisfied.
Estimated G matrix is not positive definite.
Fit Statistics
-2 Res Log Likelihood	1100.21
AIC (smaller is better)	1108.21
AICC (smaller is better)	1108.48
BIC (smaller is better)	1106.65
CAIC (smaller is better)	1110.65
HQIC (smaller is better)	1104.02
Generalized Chi-Square	7660.78
Gener. Chi-Square / DF	48.79
Covariance Parameter Estimates
Cov Parm	Subject	Estimate	Standard
			Error
Variance	ID	0	.
AR(1)	ID	0.9335	.
Variance	ID	0.8687	2.2465
AR(1)	ID	-1	.
ID		101.12	103.09
Residual		48.7948	5.5733
Type III Tests of Fixed Effects
Effect	Num DF	Den DF	F Value	Pr > F
age	4	6.612	0.04	0.9968
Month(age)	10	153.4	167.26	<.0001
age Least Squares Means
age	Estimate	Standard	DF	t Value	Pr > |t|
		Error
5	45.7844	6.176	2.363	7.41	0.0109
6	45.4524	6.0018	2.146	7.57	0.0139
7	45.1764	5.9057	2.063	7.65	0.0152
8	44.8711	6.0242	2.192	7.45	0.0135
9	45.4728	6.3061	2.58	7.21	0.0089
Differences of age Least Squares Means
Adjustment for Multiple Comparisons: Tukey-Kramer
age	age	Estimate	Standard Error	DF	t Value	Pr > |t|	Adj P
5	6	0.332	2.7136	3.803	0.12	0.9088	0.9999
5	7	0.6079	2.1692	110.4	0.28	0.7798	0.9986
5	8	0.9132	2.6779	10.26	0.34	0.74	0.9966
5	9	0.3116	3.359	100.7	0.09	0.9263	1
6	7	0.276	2.0172	2.292	0.14	0.9023	0.9999
6	8	0.5813	2.2937	39.06	0.25	0.8013	0.999
6	9	-0.02038	2.9539	14.68	-0.01	0.9946	1
7	8	0.3053	2.0744	3.291	0.15	0.8916	0.9998
7	9	-0.2964	2.6128	121.3	-0.11	0.9099	1
8	9	-0.6017	3.0162	8.194	-0.2	0.8468	0.9996
Tukey-Kramer Grouping
for age Least Squares
Means (Alpha=0.05)
LS-means with the
same letter are
not significantly
different.
age	Estimate
5	45.7844	A
		A
9	45.4728	A
		A
6	45.4524	A
		A
7	45.1764	A
		A
8	44.8711	A
Month(age) Least Squares Means
Month	age	Estimate	Standard	DF	t Value	Pr > |t|
			Error
3	5	39.6058	6.5562	3.013	6.04	0.009
4	5	72.1237	6.4894	2.89	11.11	0.0018
5	5	25.6237	6.4894	2.89	3.95	0.031
3	6	34.4177	6.2417	2.514	5.51	0.0184
4	6	78.5432	6.1536	2.38	12.76	0.003
5	6	23.3963	6.1696	2.39	3.79	0.0473
3	7	37.4998	6.0742	2.308	6.17	0.0176
4	7	73.0795	6.0183	2.226	12.14	0.0045
5	7	24.95	6.0602	2.288	4.12	0.0429
3	8	36.728	6.2239	2.501	5.9	0.0159
4	8	74.7284	6.1779	2.426	12.1	0.0032
5	8	23.157	6.4539	2.893	3.59	0.0393
3	9	34.549	6.772	3.445	5.1	0.0103
4	9	70.7204	6.5629	3.034	10.78	0.0016
5	9	31.149	7.2364	4.501	4.3	0.0097
Differences of Month(age) Least Squares Means
Adjustment for Multiple Comparisons: Tukey-Kramer
Month	age	Month	age	Estimate	Standard Error	DF	t Value	Pr > |t|	Adj P
3	5	4	5	-32.5179	3.6153	153.3	-8.99	<.0001	<.0001
3	5	5	5	13.9821	3.6153	153.3	3.87	0.0002	0.013
3	5	3	6	5.1881	3.8912	20.39	1.33	0.1971	0.9852
3	5	4	6	-38.9374	3.7362	18.91	-10.42	<.0001	<.0001
3	5	5	6	16.2095	3.7864	16.48	4.28	0.0005	0.0264
3	5	3	7	2.106	3.3778	152	0.62	0.5339	1
3	5	4	7	-33.4737	3.3203	149.1	-10.08	<.0001	<.0001
3	5	5	7	14.6558	3.3784	150.3	4.34	<.0001	0.0024
3	5	3	8	2.8778	3.8017	37.08	0.76	0.4538	1
3	5	4	8	-35.1226	3.7269	34.67	-9.42	<.0001	<.0001
3	5	5	8	16.4488	4.1684	49.33	3.95	0.0003	0.0178
3	5	3	9	5.0568	4.7134	143.4	1.07	0.2851	0.9991
3	5	4	9	-31.1146	4.4077	138.3	-7.06	<.0001	<.0001
3	5	5	9	8.4568	5.3593	149.7	1.58	0.1167	0.9609
4	5	5	5	46.5	3.4927	153.3	13.31	<.0001	<.0001
4	5	3	6	37.706	3.7776	18.03	9.98	<.0001	<.0001
4	5	4	6	-6.4196	3.6177	16.54	-1.77	0.0944	0.8787
4	5	5	6	48.7274	3.6695	14.37	13.28	<.0001	<.0001
4	5	3	7	34.6238	3.2463	151	10.67	<.0001	<.0001
4	5	4	7	-0.9558	3.1864	147.4	-0.3	0.7646	1
4	5	5	7	47.1737	3.2469	148.9	14.53	<.0001	<.0001
4	5	3	8	35.3957	3.6853	33.45	9.6	<.0001	<.0001
4	5	4	8	-2.6047	3.6081	31.08	-0.72	0.4757	1
4	5	5	8	48.9667	4.0625	45.66	12.05	<.0001	<.0001
4	5	3	9	37.5747	4.6201	142	8.13	<.0001	<.0001
4	5	4	9	1.4033	4.3078	136.3	0.33	0.7451	1
4	5	5	9	40.9747	5.2774	149.1	7.76	<.0001	<.0001
5	5	3	6	-8.794	3.7776	18.03	-2.33	0.0318	0.5852
5	5	4	6	-52.9196	3.6177	16.54	-14.63	<.0001	<.0001
5	5	5	6	2.2274	3.6695	14.37	0.61	0.5533	1
5	5	3	7	-11.8762	3.2463	151	-3.66	0.0004	0.0262
5	5	4	7	-47.4558	3.1864	147.4	-14.89	<.0001	<.0001
5	5	5	7	0.6737	3.2469	148.9	0.21	0.8359	1
5	5	3	8	-11.1043	3.6853	33.45	-3.01	0.0049	0.2001
5	5	4	8	-49.1047	3.6081	31.08	-13.61	<.0001	<.0001
5	5	5	8	2.4667	4.0625	45.66	0.61	0.5467	1
5	5	3	9	-8.9253	4.6201	142	-1.93	0.0554	0.8329
5	5	4	9	-45.0967	4.3078	136.3	-10.47	<.0001	<.0001
5	5	5	9	-5.5253	5.2774	149.1	-1.05	0.2968	0.9993
3	6	4	6	-44.1256	2.6719	153.5	-16.51	<.0001	<.0001
3	6	5	6	11.0214	2.6719	153.5	4.12	<.0001	0.0052
3	6	3	7	-3.0822	3.0036	12.63	-1.03	0.3241	0.9981
3	6	4	7	-38.6618	2.8884	11.1	-13.39	<.0001	<.0001
3	6	5	7	9.4677	2.9768	12.08	3.18	0.0079	0.2131
3	6	3	8	-2.3103	3.2569	109	-0.71	0.4796	1
3	6	4	8	-40.3107	3.1767	102	-12.69	<.0001	<.0001
3	6	5	8	11.2607	3.6847	125.6	3.06	0.0027	0.1473
3	6	3	9	-0.1313	4.2137	50.35	-0.03	0.9753	1
3	6	4	9	-36.3027	3.8687	38.65	-9.38	<.0001	<.0001
3	6	5	9	3.2687	4.9256	75.81	0.66	0.5089	1
4	6	5	6	55.1469	2.4883	154.2	22.16	<.0001	<.0001
4	6	3	7	41.0434	2.8141	10.13	14.58	<.0001	<.0001
4	6	4	7	5.4638	2.692	8.649	2.03	0.0743	0.7482
4	6	5	7	53.5933	2.7869	9.588	19.23	<.0001	<.0001
4	6	3	8	41.8152	3.0456	108.6	13.73	<.0001	<.0001
4	6	4	8	3.8148	2.9598	100.6	1.29	0.2004	0.9934
4	6	5	8	55.3862	3.4994	127	15.83	<.0001	<.0001
4	6	3	9	43.9943	4.0771	46.39	10.79	<.0001	<.0001
4	6	4	9	7.8228	3.7195	34.63	2.1	0.0428	0.7242
4	6	5	9	47.3943	4.8092	72.57	9.85	<.0001	<.0001
5	6	3	7	-14.1035	2.8526	9.675	-4.94	0.0006	0.023
5	6	4	7	-49.6832	2.7299	8.357	-18.2	<.0001	<.0001
5	6	5	7	-1.5537	2.823	9.231	-0.55	0.5951	1
5	6	3	8	-13.3317	3.1547	91.1	-4.23	<.0001	0.0048
5	6	4	8	-51.3321	3.0718	83.16	-16.71	<.0001	<.0001
5	6	5	8	0.2393	3.5946	112.8	0.07	0.947	1
5	6	3	9	-11.1527	4.111	45.66	-2.71	0.0094	0.3297
5	6	4	9	-47.3241	3.7566	34.11	-12.6	<.0001	<.0001
5	6	5	9	-7.7527	4.838	71.47	-1.6	0.1135	0.9526
3	7	4	7	-35.5796	2.258	153.4	-15.76	<.0001	<.0001
3	7	5	7	12.5499	2.3645	153.4	5.31	<.0001	<.0001
3	7	3	8	0.7718	2.9572	14.3	0.26	0.7978	1
3	7	4	8	-37.2286	2.8593	12.48	-13.02	<.0001	<.0001
3	7	5	8	14.3429	3.4148	24.36	4.2	0.0003	0.0185
3	7	3	9	2.9509	3.8628	151.4	0.76	0.4461	1
3	7	4	9	-33.2206	3.4833	147.7	-9.54	<.0001	<.0001
3	7	5	9	6.3509	4.629	154.3	1.37	0.1721	0.9886
4	7	5	7	48.1295	2.2218	153.4	21.66	<.0001	<.0001
4	7	3	8	36.3515	2.8461	11.9	12.77	<.0001	<.0001
4	7	4	8	-1.6489	2.7441	10.23	-0.6	0.561	1
4	7	5	8	49.9225	3.319	21.34	15.04	<.0001	<.0001
4	7	3	9	38.5305	3.7612	151	10.24	<.0001	<.0001
4	7	4	9	2.3591	3.3702	146.9	0.7	0.485	1
4	7	5	9	41.9305	4.5445	154.3	9.23	<.0001	<.0001
5	7	3	8	-11.778	2.9341	13.58	-4.01	0.0014	0.0541
5	7	4	8	-49.7784	2.8352	11.82	-17.56	<.0001	<.0001
5	7	5	8	1.793	3.3946	23.46	0.53	0.6023	1
5	7	3	9	-9.599	3.86	150.2	-2.49	0.014	0.4563
5	7	4	9	-45.7704	3.4802	145.7	-13.15	<.0001	<.0001
5	7	5	9	-6.199	4.6266	153.9	-1.34	0.1823	0.9909
3	8	4	8	-38.0004	2.7482	153.3	-13.83	<.0001	<.0001
3	8	5	8	13.571	3.3223	153.3	4.08	<.0001	0.006
3	8	3	9	2.179	4.1986	32.3	0.52	0.6073	1
3	8	4	9	-33.9924	3.8523	23.39	-8.82	<.0001	<.0001
3	8	5	9	5.579	4.9127	54.19	1.14	0.2611	0.9978
4	8	5	8	51.5714	3.2336	153.3	15.95	<.0001	<.0001
4	8	3	9	40.1794	4.1316	29.96	9.72	<.0001	<.0001
4	8	4	9	4.008	3.7791	21.29	1.06	0.3008	0.9983
4	8	5	9	43.5794	4.8555	51.65	8.98	<.0001	<.0001
5	8	3	9	-11.392	4.5338	41.51	-2.51	0.016	0.4538
5	8	4	9	-47.5634	4.2151	32.22	-11.28	<.0001	<.0001
5	8	5	9	-7.992	5.2021	62.99	-1.54	0.1295	0.9655
3	9	4	9	-36.1714	4.0902	153.3	-8.84	<.0001	<.0001
3	9	5	9	3.4	5.1014	153.3	0.67	0.5061	1
4	9	5	9	39.5714	4.8203	153.3	8.21	<.0001	<.0001
Conservative Tukey-Kramer Grouping for Month(age) Least Squares Means (Alpha=0.05)
LS-means with the
same letter are not
significantly different.
Month	age	Estimate
4	6	78.5432		A
				A
4	8	74.7284		A
				A
4	7	73.0795		A
				A
4	5	72.1237		A
				A
4	9	70.7204		A
3	5	39.6058		B
				B
3	7	37.4998		B
				B
3	8	36.728	C	B
			C	B
3	9	34.549	C	B	D
			C	B	D
3	6	34.4177	C	B	D
			C	B	D
5	9	31.149	C	B	D
			C		D
5	5	25.6237	C		D
			C		D
5	7	24.95	C		D
					D
5	6	23.3963			D
					D
5	8	23.157			D
The LINES display does not reflect all significant comparisons. The following additional pairs are significantly different: (3 6,5 6).
‘Hawk test Age and Month(age), including Year of sampling as covariates, and temporal trends as autoregressive of the first order’
The GLIMMIX Procedure
Model Information
Data Set	WORK.HAWK
Response Variable	conc
Response Distribution	Gaussian
Link Function	Identity
Variance Function	Default
Variance Matrix	Not blocked
Estimation Technique	Restricted Maximum Likelihood
Degrees of Freedom Method	Kenward-Roger
Fixed Effects SE Adjustment	Kenward-Roger
Class Level Information
Class	Levels	Values
ID	3	A B C
Month	3	3 4 5
Year	3	2012 2013 2014
age	5	5 6 7 8 9
Number of Observations Read	172
Number of Observations Used	172
Dimensions
G-side Cov. Parameters	5
R-side Cov. Parameters	1
Columns in X	21
Columns in Z	27
Subjects (Blocks in V)	1
Max Obs per Subject	172
Optimization Information
Optimization Technique	Dual Quasi-Newton
Parameters in Optimization	5
Lower Boundaries	5
Upper Boundaries	2
Fixed Effects	Profiled
Residual Variance	Profiled
Starting From	Data
Iteration History
Iteration	Restarts	Evaluations	Objective	Change	Max
			Function		Gradient
0	0	4	1202.57	.	1.82086
1	0	5	1197.04	5.53039	0.270704
2	0	2	1196.94	0.0985508	0.014597
3	0	4	1196.94	0.0005962	0.00147
4	0	2	1196.94	6.55e-06	7.1e-05
5	0	2	1196.94	2e-08	3.63e-07
Convergence criterion (GCONV=1E-8) satisfied.
Estimated G matrix is not positive definite.
Fit Statistics
-2 Res Log Likelihood	1196.94
AIC (smaller is better)	1204.94
AICC (smaller is better)	1205.21
BIC (smaller is better)	1203.38
CAIC (smaller is better)	1207.38
HQIC (smaller is better)	1200.75
Generalized Chi-Square	14182.6
Gener. Chi-Square / DF	90.34
Covariance Parameter Estimates
Cov Parm	Subject	Estimate	Standard
			Error
Variance	ID	85.3268	311.95
AR(1)	ID	1	.
Variance	ID	0	.
AR(1)	ID	0	.
ID		223.53	.
Residual		90.3351	10.2616
Type III Tests of Fixed Effects
Effect	Num DF	Den DF	F Value	Pr > F
age	4	155.4	5.56	0.0003
Month(age)	10	155	74.78	<.0001
age Least Squares Means
age	Estimate	Standard	DF	t Value	Pr > |t|
		Error
5	37.7653	10.4248	2.183	3.62	0.06
6	38.804	10.2744	2.061	3.78	0.0606
7	32.939	10.2259	2.023	3.22	0.0831
8	41.3989	10.3128	2.092	4.01	0.0527
9	43.1598	10.5747	2.31	4.08	0.043
Differences of age Least Squares Means
Adjustment for Multiple Comparisons: Tukey-Kramer
age	age	Estimate	Standard Error	DF	t Value	Pr > |t|	Adj P
5	6	-1.0387	2.6567	155.3	-0.39	0.6964	0.995
5	7	4.8263	2.6526	155.5	1.82	0.0708	0.3661
5	8	-3.6336	3.2853	155.8	-1.11	0.2704	0.8032
5	9	-5.3945	4.1421	156	-1.3	0.1947	0.6902
6	7	5.865	2.0244	155.3	2.9	0.0043	0.0345
6	8	-2.5949	2.5371	155.6	-1.02	0.308	0.8445
6	9	-4.3558	3.6837	155.9	-1.18	0.2388	0.7614
7	8	-8.4598	2.271	155.3	-3.73	0.0003	0.0025
7	9	-10.2208	3.2793	155.6	-3.12	0.0022	0.0183
8	9	-1.761	3.381	155.4	-0.52	0.6032	0.9851
Tukey-Kramer Grouping
for age Least Squares
Means (Alpha=0.05)
LS-means with the
same letter are
not significantly
different.
age	Estimate
9	43.1598		A
			A
8	41.3989		A
			A
6	38.804		A
			A
5	37.7653	B	A
		B
7	32.939	B
Month(age) Least Squares Means
Month	age	Estimate	Standard	DF	t Value	Pr > |t|
			Error
3	5	22.0332	10.8461	2.557	2.03	0.1508
4	5	85.3189	10.7715	2.488	7.92	0.008
5	5	5.9439	10.7715	2.488	0.55	0.6267
3	6	29.7415	10.5357	2.278	2.82	0.0914
4	6	71.5756	10.4453	2.201	6.85	0.016
5	6	15.0949	10.4482	2.204	1.44	0.2744
3	7	29.5081	10.4062	2.169	2.84	0.0959
4	7	44.5145	10.347	2.12	4.3	0.045
5	7	24.7946	10.3918	2.157	2.39	0.1306
3	8	32.4945	10.5307	2.274	3.09	0.0773
4	8	60.1725	10.4795	2.23	5.74	0.0225
5	8	31.5296	10.783	2.5	2.92	0.0765
3	9	34.017	11.0952	2.799	3.07	0.0599
4	9	58.4456	10.8601	2.57	5.38	0.0185
5	9	37.017	11.6253	3.371	3.18	0.0425
Differences of Month(age) Least Squares Means
Adjustment for Multiple Comparisons: Tukey-Kramer
Month	age	Month	age	Estimate	Standard Error	DF	t Value	Pr > |t|	Adj P
3	5	4	5	-63.2857	4.919	155	-12.87	<.0001	<.0001
3	5	5	5	16.0893	4.919	155	3.27	0.0013	0.0827
3	5	3	6	-7.7083	4.6321	155.1	-1.66	0.0981	0.9405
3	5	4	6	-49.5424	4.455	155.1	-11.12	<.0001	<.0001
3	5	5	6	6.9382	4.3971	155.1	1.58	0.1166	0.961
3	5	3	7	-7.4749	4.4279	155.2	-1.69	0.0934	0.9337
3	5	4	7	-22.4813	4.3168	155.2	-5.21	<.0001	<.0001
3	5	5	7	-2.7614	4.4029	155.2	-0.63	0.5315	1
3	5	3	8	-10.4613	4.9278	155.4	-2.12	0.0353	0.7176
3	5	4	8	-38.1393	4.8194	155.4	-7.91	<.0001	<.0001
3	5	5	8	-9.4965	5.4479	155.3	-1.74	0.0833	0.916
3	5	3	9	-11.9838	6.1155	155.5	-1.96	0.0518	0.8183
3	5	4	9	-36.4124	5.6777	155.6	-6.41	<.0001	<.0001
3	5	5	9	-14.9838	7.0316	155.4	-2.13	0.0347	0.7122
4	5	5	5	79.375	4.7522	155	16.7	<.0001	<.0001
4	5	3	6	55.5774	4.4546	155.1	12.48	<.0001	<.0001
4	5	4	6	13.7433	4.2701	155.1	3.22	0.0016	0.0953
4	5	5	6	70.224	4.2097	155.1	16.68	<.0001	<.0001
4	5	3	7	55.8108	4.2418	155.2	13.16	<.0001	<.0001
4	5	4	7	40.8044	4.1258	155.3	9.89	<.0001	<.0001
4	5	5	7	60.5243	4.2157	155.2	14.36	<.0001	<.0001
4	5	3	8	52.8244	4.7613	155.4	11.09	<.0001	<.0001
4	5	4	8	25.1464	4.649	155.4	5.41	<.0001	<.0001
4	5	5	8	53.7892	5.2977	155.3	10.15	<.0001	<.0001
4	5	3	9	51.3019	5.9821	155.5	8.58	<.0001	<.0001
4	5	4	9	26.8733	5.5339	155.6	4.86	<.0001	0.0003
4	5	5	9	48.3019	6.9159	155.4	6.98	<.0001	<.0001
5	5	3	6	-23.7976	4.4546	155.1	-5.34	<.0001	<.0001
5	5	4	6	-65.6317	4.2701	155.1	-15.37	<.0001	<.0001
5	5	5	6	-9.151	4.2097	155.1	-2.17	0.0312	0.6828
5	5	3	7	-23.5642	4.2418	155.2	-5.56	<.0001	<.0001
5	5	4	7	-38.5706	4.1258	155.3	-9.35	<.0001	<.0001
5	5	5	7	-18.8507	4.2157	155.2	-4.47	<.0001	0.0014
5	5	3	8	-26.5506	4.7613	155.4	-5.58	<.0001	<.0001
5	5	4	8	-54.2286	4.649	155.4	-11.66	<.0001	<.0001
5	5	5	8	-25.5858	5.2977	155.3	-4.83	<.0001	0.0003
5	5	3	9	-28.0731	5.9821	155.5	-4.69	<.0001	0.0006
5	5	4	9	-52.5017	5.5339	155.6	-9.49	<.0001	<.0001
5	5	5	9	-31.0731	6.9159	155.4	-4.49	<.0001	0.0013
3	6	4	6	-41.8341	3.6318	155	-11.52	<.0001	<.0001
3	6	5	6	14.6466	3.6318	155	4.03	<.0001	0.0073
3	6	3	7	0.2334	3.6383	155.1	0.06	0.9489	1
3	6	4	7	-14.773	3.4786	155.1	-4.25	<.0001	0.0033
3	6	5	7	4.947	3.5918	155.1	1.38	0.1704	0.9882
3	6	3	8	-2.753	4.0487	155.2	-0.68	0.4975	1
3	6	4	8	-30.431	3.918	155.3	-7.77	<.0001	<.0001
3	6	5	8	-1.7881	4.6694	155.2	-0.38	0.7023	1
3	6	3	9	-4.2755	5.5033	155.4	-0.78	0.4384	1
3	6	4	9	-28.704	5.0124	155.5	-5.73	<.0001	<.0001
3	6	5	9	-7.2755	6.5062	155.3	-1.12	0.2652	0.9986
4	6	5	6	56.4807	3.3698	155	16.76	<.0001	<.0001
4	6	3	7	42.0675	3.3727	155.1	12.47	<.0001	<.0001
4	6	4	7	27.0611	3.1966	155.1	8.47	<.0001	<.0001
4	6	5	7	46.781	3.3203	155.1	14.09	<.0001	<.0001
4	6	3	8	39.0811	3.7867	155.2	10.32	<.0001	<.0001
4	6	4	8	11.4031	3.647	155.3	3.13	0.0021	0.1211
4	6	5	8	40.0459	4.4444	155.2	9.01	<.0001	<.0001
4	6	3	9	37.5586	5.3227	155.5	7.06	<.0001	<.0001
4	6	4	9	13.13	4.8135	155.6	2.73	0.0071	0.2985
4	6	5	9	34.5586	6.3542	155.3	5.44	<.0001	<.0001
5	6	3	7	-14.4132	3.3715	155.1	-4.27	<.0001	0.003
5	6	4	7	-29.4196	3.2018	155.1	-9.19	<.0001	<.0001
5	6	5	7	-9.6996	3.3234	155.1	-2.92	0.004	0.1998
5	6	3	8	-17.3996	3.8356	155.3	-4.54	<.0001	0.0011
5	6	4	8	-45.0776	3.6972	155.3	-12.19	<.0001	<.0001
5	6	5	8	-16.4347	4.4857	155.2	-3.66	0.0003	0.0256
5	6	3	9	-18.922	5.3394	155.5	-3.54	0.0005	0.0373
5	6	4	9	-43.3506	4.8319	155.6	-8.97	<.0001	<.0001
5	6	5	9	-21.922	6.3682	155.3	-3.44	0.0007	0.0507
3	7	4	7	-15.0064	3.0707	155	-4.89	<.0001	0.0002
3	7	5	7	4.7136	3.2151	155	1.47	0.1447	0.9791
3	7	3	8	-2.9864	3.671	155.1	-0.81	0.4172	1
3	7	4	8	-30.6644	3.5218	155.1	-8.71	<.0001	<.0001
3	7	5	8	-2.0215	4.3423	155.1	-0.47	0.6422	1
3	7	3	9	-4.5089	5.0786	155.3	-0.89	0.376	0.9999
3	7	4	9	-28.9374	4.542	155.3	-6.37	<.0001	<.0001
3	7	5	9	-7.5089	6.1511	155.2	-1.22	0.224	0.9964
4	7	5	7	19.7199	3.0221	155	6.53	<.0001	<.0001
4	7	3	8	12.02	3.4826	155.1	3.45	0.0007	0.0493
4	7	4	8	-15.658	3.3247	155.1	-4.71	<.0001	0.0005
4	7	5	8	12.9849	4.1841	155.1	3.1	0.0023	0.1285
4	7	3	9	10.4975	4.9374	155.3	2.13	0.0351	0.7155
4	7	4	9	-13.9311	4.3836	155.3	-3.18	0.0018	0.1061
4	7	5	9	7.4975	6.0351	155.2	1.24	0.216	0.9957
5	7	3	8	-7.6999	3.6219	155.1	-2.13	0.0351	0.7156
5	7	4	8	-35.3779	3.471	155.1	-10.19	<.0001	<.0001
5	7	5	8	-6.7351	4.3012	155.1	-1.57	0.1194	0.9634
5	7	3	9	-9.2224	5.0561	155.3	-1.82	0.0701	0.8847
5	7	4	9	-33.651	4.5169	155.4	-7.45	<.0001	<.0001
5	7	5	9	-12.2224	6.1326	155.2	-1.99	0.048	0.7993
3	8	4	8	-27.678	3.7391	155	-7.4	<.0001	<.0001
3	8	5	8	0.9648	4.5204	155	0.21	0.8313	1
3	8	3	9	-1.5225	5.2247	155.2	-0.29	0.7711	1
3	8	4	9	-25.9511	4.7048	155.2	-5.52	<.0001	<.0001
3	8	5	9	-4.5225	6.2723	155.1	-0.72	0.472	1
4	8	5	8	28.6429	4.3997	155	6.51	<.0001	<.0001
4	8	3	9	26.1555	5.114	155.2	5.11	<.0001	<.0001
4	8	4	9	1.7269	4.5816	155.2	0.38	0.7067	1
4	8	5	9	23.1555	6.1805	155.1	3.75	0.0003	0.0195
5	8	3	9	-2.4873	5.7102	155.1	-0.44	0.6637	1
5	8	4	9	-26.9159	5.2387	155.1	-5.14	<.0001	<.0001
5	8	5	9	-5.4873	6.6821	155.1	-0.82	0.4128	1
3	9	4	9	-24.4286	5.5653	155	-4.39	<.0001	0.0019
3	9	5	9	-3	6.9411	155	-0.43	0.6662	1
4	9	5	9	21.4286	6.5587	155	3.27	0.0013	0.0835
Conservative Tukey-Kramer Grouping for Month(age) Least Squares Means (Alpha=0.05)
LS-means with the
same letter are not
significantly different.
Month	age	Estimate
4	5	85.3189		A
				A
4	6	71.5756	B	A
			B
4	8	60.1725	B
			B
4	9	58.4456	B	C
				C
4	7	44.5145	D	C
			D	C
5	9	37.017	D	C	E
			D		E
3	9	34.017	D		E
			D		E
3	8	32.4945	D		E
			D		E
5	8	31.5296	D		E
					E
3	6	29.7415			E
					E
3	7	29.5081			E
					E
5	7	24.7946			E
					E
3	5	22.0332		F	E
				F	E
5	6	15.0949		F	E
				F
5	5	5.9439		F
The LINES display does not reflect all significant comparisons. The following additional pairs are significantly different: (4 7,3 8), (3 9,5 6), (3 8,5 6), (5 8,5 6), (3 6,5 6), (3 7,5 6).
‘Hawk test Age and Month(age), including Year of sampling as covariates, and temporal trends as autoregressive of the first order’
The GLIMMIX Procedure
Model Information
Data Set	WORK.HAWK
Response Variable	mot_pc
Response Distribution	Gaussian
Link Function	Identity
Variance Function	Default
Variance Matrix	Not blocked
Estimation Technique	Restricted Maximum Likelihood
Degrees of Freedom Method	Kenward-Roger
Fixed Effects SE Adjustment	Kenward-Roger
Class Level Information
Class	Levels	Values
ID	3	A B C
Month	3	3 4 5
Year	3	2012 2013 2014
age	5	5 6 7 8 9
Number of Observations Read	172
Number of Observations Used	172
Dimensions
G-side Cov. Parameters	5
R-side Cov. Parameters	1
Columns in X	21
Columns in Z	27
Subjects (Blocks in V)	1
Max Obs per Subject	172
Optimization Information
Optimization Technique	Dual Quasi-Newton
Parameters in Optimization	5
Lower Boundaries	5
Upper Boundaries	2
Fixed Effects	Profiled
Residual Variance	Profiled
Starting From	Data
Iteration History
Iteration	Restarts	Evaluations	Objective	Change	Max
			Function		Gradient
0	0	4	991.749	.	3.73585
1	0	3	989.256	2.49371	2.35842
2	0	2	989.06	0.195133	0.448027
3	0	5	988.949	0.111466	0.169802
4	0	3	988.941	0.00824386	0.019543
5	0	2	988.941	8.466e-05	0.004094
6	0	3	988.941	3.76e-06	9.2e-05
Convergence criterion (GCONV=1E-8) satisfied.
Estimated G matrix is not positive definite.
Fit Statistics
-2 Res Log Likelihood	988.94
AIC (smaller is better)	996.94
AICC (smaller is better)	997.2
BIC (smaller is better)	995.38
CAIC (smaller is better)	999.38
HQIC (smaller is better)	992.75
Generalized Chi-Square	3833.3
Gener. Chi-Square / DF	24.42
Covariance Parameter Estimates
Cov Parm	Subject	Estimate	Standard
			Error
Variance	ID	1.71e-12	.
AR(1)	ID	1	.
Variance	ID	0	.
AR(1)	ID	0	.
ID		22.2441	23.0567
Residual		24.4159	2.7736
Type III Tests of Fixed Effects
Effect	Num DF	Den DF	F Value	Pr > F
age	4	156.1	15.23	<.0001
Month(age)	10	155	38.66	<.0001
age Least Squares Means
age	Estimate	Standard	DF	t Value	Pr > |t|
		Error
5	73.4879	2.9957	2.696	24.53	0.0003
6	82.7777	2.8504	2.226	29.04	0.0006
7	77.5393	2.8022	2.087	27.67	0.001
8	76.4797	2.8874	2.347	26.49	0.0006
9	74.5225	3.1349	3.223	23.77	<.0001
Differences of age Least Squares Means
Adjustment for Multiple Comparisons: Tukey-Kramer
age	age	Estimate	Standard Error	DF	t Value	Pr > |t|	Adj P
5	6	-9.2898	1.3831	156	-6.72	<.0001	<.0001
5	7	-4.0514	1.3826	156.6	-2.93	0.0039	0.0314
5	8	-2.9918	1.7152	157	-1.74	0.0831	0.4101
5	9	-1.0346	2.1644	157	-0.48	0.6333	0.9893
6	7	5.2384	1.0538	155.9	4.97	<.0001	<.0001
6	8	6.2981	1.3227	156.7	4.76	<.0001	<.0001
6	9	8.2553	1.924	157	4.29	<.0001	0.0003
7	8	1.0597	1.1821	155.9	0.9	0.3714	0.8979
7	9	3.0168	1.7099	156.7	1.76	0.0796	0.3981
8	9	1.9572	1.7607	156.1	1.11	0.268	0.8002
Tukey-Kramer Grouping
for age Least Squares
Means (Alpha=0.05)
LS-means with the
same letter are
not significantly
different.
age	Estimate
6	82.7777		A
7	77.5393		B
			B
8	76.4797	C	B
		C	B
9	74.5225	C	B
		C
5	73.4879	C
Month(age) Least Squares Means
Month	age	Estimate	Standard	DF	t Value	Pr > |t|
			Error
3	5	59.2945	3.3758	4.343	17.56	<.0001
4	5	78.7409	3.3106	4.018	23.78	<.0001
5	5	82.4284	3.3106	4.018	24.9	<.0001
3	6	82.7118	3.0974	3.103	26.7	<.0001
4	6	84.4738	3.0135	2.782	28.03	0.0002
5	6	81.1477	3.0163	2.79	26.9	0.0002
3	7	69.4548	2.9762	2.655	23.34	0.0004
4	7	81.2212	2.9198	2.461	27.82	0.0004
5	7	81.942	2.9625	2.607	27.66	0.0003
3	8	64.7599	3.0926	3.088	20.94	0.0002
4	8	82.8752	3.0452	2.904	27.21	0.0001
5	8	81.8038	3.3193	4.092	24.65	<.0001
3	9	54.5098	3.5884	5.517	15.19	<.0001
4	9	83.4812	3.3884	4.395	24.64	<.0001
5	9	85.5765	4.0165	8.59	21.31	<.0001
Differences of Month(age) Least Squares Means
Adjustment for Multiple Comparisons: Tukey-Kramer
Month	age	Month	age	Estimate	Standard Error	DF	t Value	Pr > |t|	Adj P
3	5	4	5	-19.4464	2.5573	155	-7.6	<.0001	<.0001
3	5	5	5	-23.1339	2.5573	155	-9.05	<.0001	<.0001
3	5	3	6	-23.4173	2.4093	155.3	-9.72	<.0001	<.0001
3	5	4	6	-25.1793	2.3175	155.5	-10.86	<.0001	<.0001
3	5	5	6	-21.8533	2.2869	155.3	-9.56	<.0001	<.0001
3	5	3	7	-10.1604	2.304	155.6	-4.41	<.0001	0.0018
3	5	4	7	-21.9267	2.2467	155.8	-9.76	<.0001	<.0001
3	5	5	7	-22.6476	2.2911	155.7	-9.89	<.0001	<.0001
3	5	3	8	-5.4655	2.5667	156.2	-2.13	0.0348	0.7133
3	5	4	8	-23.5808	2.5105	156.3	-9.39	<.0001	<.0001
3	5	5	8	-22.5094	2.8366	156.1	-7.94	<.0001	<.0001
3	5	3	9	4.7847	3.1868	156.5	1.5	0.1353	0.9743
3	5	4	9	-24.1868	2.9598	156.6	-8.17	<.0001	<.0001
3	5	5	9	-26.282	3.6621	156.2	-7.18	<.0001	<.0001
4	5	5	5	-3.6875	2.4706	155	-1.49	0.1376	0.9756
4	5	3	6	-3.9709	2.3171	155.4	-1.71	0.0886	0.9258
4	5	4	6	-5.7329	2.2215	155.5	-2.58	0.0108	0.3911
4	5	5	6	-2.4068	2.1895	155.3	-1.1	0.2734	0.9988
4	5	3	7	9.2861	2.2074	155.7	4.21	<.0001	0.0038
4	5	4	7	-2.4803	2.1474	155.8	-1.16	0.2499	0.998
4	5	5	7	-3.2011	2.1939	155.7	-1.46	0.1465	0.98
4	5	3	8	13.9809	2.4803	156.3	5.64	<.0001	<.0001
4	5	4	8	-4.1344	2.4221	156.4	-1.71	0.0898	0.928
4	5	5	8	-3.0629	2.7587	156.1	-1.11	0.2686	0.9987
4	5	3	9	24.2311	3.1176	156.5	7.77	<.0001	<.0001
4	5	4	9	-4.7403	2.8852	156.7	-1.64	0.1024	0.9462
4	5	5	9	-6.8356	3.6021	156.2	-1.9	0.0596	0.8508
5	5	3	6	-0.2834	2.3171	155.4	-0.12	0.9028	1
5	5	4	6	-2.0454	2.2215	155.5	-0.92	0.3586	0.9998
5	5	5	6	1.2807	2.1895	155.3	0.58	0.5595	1
5	5	3	7	12.9736	2.2074	155.7	5.88	<.0001	<.0001
5	5	4	7	1.2072	2.1474	155.8	0.56	0.5748	1
5	5	5	7	0.4864	2.1939	155.7	0.22	0.8248	1
5	5	3	8	17.6684	2.4803	156.3	7.12	<.0001	<.0001
5	5	4	8	-0.4469	2.4221	156.4	-0.18	0.8539	1
5	5	5	8	0.6246	2.7587	156.1	0.23	0.8212	1
5	5	3	9	27.9186	3.1176	156.5	8.96	<.0001	<.0001
5	5	4	9	-1.0528	2.8852	156.7	-0.36	0.7157	1
5	5	5	9	-3.1481	3.6021	156.2	-0.87	0.3835	0.9999
3	6	4	6	-1.762	1.8881	155	-0.93	0.3522	0.9998
3	6	5	6	1.5641	1.8881	155	0.83	0.4087	1
3	6	3	7	13.257	1.8922	155.3	7.01	<.0001	<.0001
3	6	4	7	1.4906	1.8094	155.4	0.82	0.4113	1
3	6	5	7	0.7698	1.868	155.3	0.41	0.6808	1
3	6	3	8	17.9518	2.1071	155.8	8.52	<.0001	<.0001
3	6	4	8	-0.1635	2.0394	155.9	-0.08	0.9362	1
3	6	5	8	0.908	2.4296	155.6	0.37	0.7091	1
3	6	3	9	28.202	2.867	156.4	9.84	<.0001	<.0001
3	6	4	9	-0.7694	2.6124	156.6	-0.29	0.7687	1
3	6	5	9	-2.8647	3.3875	156	-0.85	0.399	0.9999
4	6	5	6	3.3261	1.752	155	1.9	0.0595	0.8504
4	6	3	7	15.019	1.7542	155.3	8.56	<.0001	<.0001
4	6	4	7	3.2526	1.6628	155.4	1.96	0.0523	0.8202
4	6	5	7	2.5318	1.7269	155.3	1.47	0.1446	0.9791
4	6	3	8	19.7138	1.9708	155.8	10	<.0001	<.0001
4	6	4	8	1.5985	1.8983	155.9	0.84	0.401	0.9999
4	6	5	8	2.6699	2.3125	155.6	1.15	0.25	0.998
4	6	3	9	29.964	2.7732	156.4	10.8	<.0001	<.0001
4	6	4	9	0.9925	2.5091	156.6	0.4	0.693	1
4	6	5	9	-1.1027	3.3085	156.1	-0.33	0.7394	1
5	6	3	7	11.6929	1.7537	155.4	6.67	<.0001	<.0001
5	6	4	7	-0.07347	1.6657	155.5	-0.04	0.9649	1
5	6	5	7	-0.7943	1.7286	155.4	-0.46	0.6465	1
5	6	3	8	16.3878	1.9968	156	8.21	<.0001	<.0001
5	6	4	8	-1.7275	1.925	156.1	-0.9	0.3709	0.9999
5	6	5	8	-0.6561	2.3345	155.8	-0.28	0.779	1
5	6	3	9	26.6379	2.7822	156.5	9.57	<.0001	<.0001
5	6	4	9	-2.3335	2.519	156.7	-0.93	0.3557	0.9998
5	6	5	9	-4.4287	3.316	156.1	-1.34	0.1836	0.9912
3	7	4	7	-11.7664	1.5964	155	-7.37	<.0001	<.0001
3	7	5	7	-12.4872	1.6715	155	-7.47	<.0001	<.0001
3	7	3	8	4.6949	1.9095	155.4	2.46	0.015	0.4762
3	7	4	8	-13.4204	1.832	155.4	-7.33	<.0001	<.0001
3	7	5	8	-12.349	2.2584	155.3	-5.47	<.0001	<.0001
3	7	3	9	14.945	2.6436	155.9	5.65	<.0001	<.0001
3	7	4	9	-14.0264	2.3651	156.1	-5.93	<.0001	<.0001
3	7	5	9	-16.1216	3.2007	155.6	-5.04	<.0001	0.0001
4	7	5	7	-0.7208	1.5711	155	-0.46	0.647	1
4	7	3	8	16.4612	1.8114	155.3	9.09	<.0001	<.0001
4	7	4	8	-1.6541	1.7294	155.4	-0.96	0.3403	0.9997
4	7	5	8	-0.5826	2.1759	155.2	-0.27	0.7892	1
4	7	3	9	26.7114	2.57	155.9	10.39	<.0001	<.0001
4	7	4	9	-2.26	2.2825	156.1	-0.99	0.3236	0.9996
4	7	5	9	-4.3553	3.1401	155.6	-1.39	0.1674	0.9874
5	7	3	8	17.1821	1.8839	155.4	9.12	<.0001	<.0001
5	7	4	8	-0.9332	1.8055	155.4	-0.52	0.606	1
5	7	5	8	0.1382	2.2369	155.3	0.06	0.9508	1
5	7	3	9	27.4322	2.6321	155.9	10.42	<.0001	<.0001
5	7	4	9	-1.5392	2.3521	156.1	-0.65	0.5138	1
5	7	5	9	-3.6344	3.1911	155.7	-1.14	0.2565	0.9982
3	8	4	8	-18.1153	1.9439	155	-9.32	<.0001	<.0001
3	8	5	8	-17.0439	2.3501	155	-7.25	<.0001	<.0001
3	8	3	9	10.2502	2.7182	155.5	3.77	0.0002	0.018
3	8	4	9	-18.7213	2.4482	155.7	-7.65	<.0001	<.0001
3	8	5	9	-20.8165	3.2625	155.4	-6.38	<.0001	<.0001
4	8	5	8	1.0714	2.2874	155	0.47	0.6401	1
4	8	3	9	28.3655	2.6607	155.5	10.66	<.0001	<.0001
4	8	4	9	-0.606	2.3841	155.7	-0.25	0.7997	1
4	8	5	9	-2.7012	3.2147	155.4	-0.84	0.4021	0.9999
5	8	3	9	27.294	2.9704	155.4	9.19	<.0001	<.0001
5	8	4	9	-1.6774	2.7254	155.5	-0.62	0.5391	1
5	8	5	9	-3.7726	3.4754	155.3	-1.09	0.2794	0.999
3	9	4	9	-28.9714	2.8933	155	-10.01	<.0001	<.0001
3	9	5	9	-31.0667	3.6086	155	-8.61	<.0001	<.0001
4	9	5	9	-2.0952	3.4098	155	-0.61	0.5398	1
Tukey-Kramer Grouping
for Month(age) Least
Squares Means (Alpha=0.05)
LS-means with the
same letter are not
significantly different.
Month	age	Estimate
5	9	85.5765		A
				A
4	6	84.4738		A
				A
4	9	83.4812		A
				A
4	8	82.8752		A
				A
3	6	82.7118		A
				A
5	5	82.4284		A
				A
5	7	81.942		A
				A
5	8	81.8038		A
				A
4	7	81.2212		A
				A
5	6	81.1477		A
				A
4	5	78.7409		A
3	7	69.4548		B
				B
3	8	64.7599	C	B
			C
3	5	59.2945	C	D
				D
3	9	54.5098		D
‘Hawk test Age and Month(age), including Year of sampling as covariates, and temporal trends as autoregressive of the first order’
The GLIMMIX Procedure
Model Information
Data Set	WORK.HAWK
Response Variable	viable_pc
Response Distribution	Gaussian
Link Function	Identity
Variance Function	Default
Variance Matrix	Not blocked
Estimation Technique	Restricted Maximum Likelihood
Degrees of Freedom Method	Kenward-Roger
Fixed Effects SE Adjustment	Kenward-Roger
Class Level Information
Class	Levels	Values
ID	3	A B C
Month	3	3 4 5
Year	3	2012 2013 2014
age	5	5 6 7 8 9
Number of Observations Read	172
Number of Observations Used	172
Dimensions
G-side Cov. Parameters	5
R-side Cov. Parameters	1
Columns in X	21
Columns in Z	27
Subjects (Blocks in V)	1
Max Obs per Subject	172
Optimization Information
Optimization Technique	Dual Quasi-Newton
Parameters in Optimization	5
Lower Boundaries	5
Upper Boundaries	2
Fixed Effects	Profiled
Residual Variance	Profiled
Starting From	Data
Iteration History
Iteration	Restarts	Evaluations	Objective	Change	Max
			Function		Gradient
0	0	4	974.106	.	3.15369
1	0	3	970.931	3.17496	2.21989
2	0	4	970.727	0.20431	0.413675
3	0	4	970.696	0.0310557	0.708536
4	0	2	970.646	0.0504033	0.249814
5	0	2	970.636	0.00962105	0.079931
6	0	3	970.635	0.00121103	0.02332
7	0	3	970.635	0.00012899	0.001681
8	0	3	970.635	6.5e-07	3.9e-05
Convergence criterion (GCONV=1E-8) satisfied.
Estimated G matrix is not positive definite.
Fit Statistics
-2 Res Log Likelihood	970.63
AIC (smaller is better)	978.63
AICC (smaller is better)	978.9
BIC (smaller is better)	977.07
CAIC (smaller is better)	981.07
HQIC (smaller is better)	974.44
Generalized Chi-Square	3411.02
Gener. Chi-Square / DF	21.73
Covariance Parameter Estimates
Cov Parm	Subject	Estimate	Standard
			Error
Variance	ID	0	.
AR(1)	ID	0.1561	.
Variance	ID	0	.
AR(1)	ID	0	.
ID		19.9811	20.7594
Residual		21.7262	2.4682
Type III Tests of Fixed Effects
Effect	Num DF	Den DF	F Value	Pr > F
age	4	156.1	2.43	0.0503
Month(age)	10	155	3.74	0.0002
age Least Squares Means
age	Estimate	Standard	DF	t Value	Pr > |t|
		Error
5	85.8547	2.8369	2.675	30.26	0.0002
6	83.3589	2.7004	2.212	30.87	0.0006
7	85.4031	2.6551	2.076	32.17	0.0008
8	84.5956	2.7351	2.332	30.93	0.0004
9	81.9791	2.9678	3.194	27.62	<.0001
Differences of age Least Squares Means
Adjustment for Multiple Comparisons: Tukey-Kramer
age	age	Estimate	Standard Error	DF	t Value	Pr > |t|	Adj P
5	6	2.4958	1.3047	155.9	1.91	0.0576	0.3149
5	7	0.4516	1.3042	156.6	0.35	0.7296	0.9969
5	8	1.2591	1.618	157	0.78	0.4376	0.9366
5	9	3.8756	2.0417	157	1.9	0.0595	0.3226
6	7	-2.0442	0.9941	155.9	-2.06	0.0414	0.2445
6	8	-1.2367	1.2478	156.7	-0.99	0.3232	0.859
6	9	1.3798	1.8149	157	0.76	0.4482	0.9415
7	8	0.8075	1.1151	155.9	0.72	0.4701	0.9506
7	9	3.424	1.613	156.7	2.12	0.0353	0.2157
8	9	2.6165	1.6609	156.1	1.58	0.1172	0.5154
Tukey-Kramer Grouping
for age Least Squares
Means (Alpha=0.05)
LS-means with the
same letter are
not significantly
different.
age	Estimate
5	85.8547	A
		A
7	85.4031	A
		A
8	84.5956	A
		A
6	83.3589	A
		A
9	81.9791	A
Month(age) Least Squares Means
Month	age	Estimate	Standard	DF	t Value	Pr > |t|
			Error
3	5	82.7029	3.1943	4.295	25.89	<.0001
4	5	87.8994	3.1329	3.976	28.06	<.0001
5	5	86.9619	3.1329	3.976	27.76	<.0001
3	6	81.4041	2.9325	3.076	27.76	<.0001
4	6	86.7641	2.8537	2.76	30.4	0.0001
5	6	81.9087	2.8563	2.768	28.68	0.0002
3	7	83.944	2.8186	2.635	29.78	0.0002
4	7	87.1034	2.7657	2.443	31.49	0.0003
5	7	85.162	2.8058	2.588	30.35	0.0002
3	8	82.9885	2.928	3.061	28.34	<.0001
4	8	86.9349	2.8835	2.88	30.15	0.0001
5	8	83.8634	3.1411	4.049	26.7	<.0001
3	9	80.4585	3.3942	5.45	23.7	<.0001
4	9	87.2871	3.2061	4.347	27.23	<.0001
5	9	78.1918	3.797	8.469	20.59	<.0001
Differences of Month(age) Least Squares Means
Adjustment for Multiple Comparisons: Tukey-Kramer
Month	age	Month	age	Estimate	Standard Error	DF	t Value	Pr > |t|	Adj P
3	5	4	5	-5.1964	2.4124	155	-2.15	0.0328	0.6964
3	5	5	5	-4.2589	2.4124	155	-1.77	0.0795	0.908
3	5	3	6	1.2988	2.2727	155.3	0.57	0.5685	1
3	5	4	6	-4.0611	2.1862	155.4	-1.86	0.0651	0.8699
3	5	5	6	0.7942	2.1573	155.3	0.37	0.7133	1
3	5	3	7	-1.2411	2.1734	155.6	-0.57	0.5688	1
3	5	4	7	-4.4005	2.1193	155.8	-2.08	0.0395	0.7483
3	5	5	7	-2.4591	2.1612	155.7	-1.14	0.2569	0.9983
3	5	3	8	-0.2856	2.4212	156.2	-0.12	0.9062	1
3	5	4	8	-4.2319	2.3682	156.3	-1.79	0.0759	0.8999
3	5	5	8	-1.1605	2.6759	156.1	-0.43	0.6651	1
3	5	3	9	2.2444	3.0061	156.5	0.75	0.4564	1
3	5	4	9	-4.5841	2.792	156.6	-1.64	0.1026	0.9464
3	5	5	9	4.5111	3.4545	156.2	1.31	0.1935	0.9929
4	5	5	5	0.9375	2.3306	155	0.4	0.688	1
4	5	3	6	6.4953	2.1857	155.4	2.97	0.0034	0.1769
4	5	4	6	1.1353	2.0956	155.5	0.54	0.5888	1
4	5	5	6	5.9906	2.0654	155.3	2.9	0.0043	0.208
4	5	3	7	3.9553	2.0822	155.7	1.9	0.0593	0.8498
4	5	4	7	0.796	2.0257	155.8	0.39	0.6949	1
4	5	5	7	2.7374	2.0695	155.7	1.32	0.1879	0.992
4	5	3	8	4.9108	2.3397	156.3	2.1	0.0374	0.7336
4	5	4	8	0.9645	2.2848	156.4	0.42	0.6735	1
4	5	5	8	4.0359	2.6023	156.1	1.55	0.123	0.9662
4	5	3	9	7.4409	2.9409	156.5	2.53	0.0124	0.4256
4	5	4	9	0.6123	2.7217	156.7	0.22	0.8223	1
4	5	5	9	9.7075	3.3979	156.2	2.86	0.0049	0.2288
5	5	3	6	5.5578	2.1857	155.4	2.54	0.012	0.4169
5	5	4	6	0.1978	2.0956	155.5	0.09	0.9249	1
5	5	5	6	5.0531	2.0654	155.3	2.45	0.0155	0.4849
5	5	3	7	3.0178	2.0822	155.7	1.45	0.1493	0.9812
5	5	4	7	-0.1415	2.0257	155.8	-0.07	0.9444	1
5	5	5	7	1.7999	2.0695	155.7	0.87	0.3858	0.9999
5	5	3	8	3.9733	2.3397	156.3	1.7	0.0915	0.9307
5	5	4	8	0.02698	2.2848	156.4	0.01	0.9906	1
5	5	5	8	3.0984	2.6023	156.1	1.19	0.2356	0.9972
5	5	3	9	6.5034	2.9409	156.5	2.21	0.0285	0.6563
5	5	4	9	-0.3252	2.7217	156.7	-0.12	0.905	1
5	5	5	9	8.77	3.3979	156.2	2.58	0.0108	0.3909
3	6	4	6	-5.36	1.7811	155	-3.01	0.0031	0.1619
3	6	5	6	-0.5046	1.7811	155	-0.28	0.7773	1
3	6	3	7	-2.54	1.785	155.3	-1.42	0.1567	0.984
3	6	4	7	-5.6993	1.7068	155.4	-3.34	0.0011	0.0683
3	6	5	7	-3.7579	1.7621	155.3	-2.13	0.0345	0.7111
3	6	3	8	-1.5845	1.9877	155.8	-0.8	0.4266	1
3	6	4	8	-5.5308	1.9237	155.9	-2.88	0.0046	0.22
3	6	5	8	-2.4594	2.2919	155.6	-1.07	0.2849	0.9991
3	6	3	9	0.9456	2.7045	156.4	0.35	0.7271	1
3	6	4	9	-5.883	2.4643	156.5	-2.39	0.0182	0.528
3	6	5	9	3.2123	3.1955	156	1.01	0.3163	0.9996
4	6	5	6	4.8554	1.6527	155	2.94	0.0038	0.1913
4	6	3	7	2.82	1.6548	155.3	1.7	0.0903	0.9288
4	6	4	7	-0.3393	1.5686	155.4	-0.22	0.829	1
4	6	5	7	1.6021	1.629	155.3	0.98	0.3269	0.9997
4	6	3	8	3.7755	1.8591	155.8	2.03	0.044	0.7768
4	6	4	8	-0.1708	1.7907	155.9	-0.1	0.9241	1
4	6	5	8	2.9006	2.1814	155.6	1.33	0.1856	0.9915
4	6	3	9	6.3056	2.616	156.4	2.41	0.0171	0.5111
4	6	4	9	-0.523	2.3669	156.6	-0.22	0.8254	1
4	6	5	9	8.5722	3.1209	156.1	2.75	0.0067	0.2876
5	6	3	7	-2.0353	1.6542	155.4	-1.23	0.2204	0.9961
5	6	4	7	-5.1947	1.5713	155.5	-3.31	0.0012	0.075
5	6	5	7	-3.2533	1.6306	155.3	-2	0.0478	0.7981
5	6	3	8	-1.0798	1.8836	156	-0.57	0.5673	1
5	6	4	8	-5.0262	1.8159	156.1	-2.77	0.0063	0.2756
5	6	5	8	-1.9547	2.2021	155.7	-0.89	0.3761	0.9999
5	6	3	9	1.4502	2.6245	156.4	0.55	0.5813	1
5	6	4	9	-5.3784	2.3762	156.7	-2.26	0.025	0.6188
5	6	5	9	3.7169	3.1281	156.1	1.19	0.2365	0.9973
3	7	4	7	-3.1593	1.5059	155	-2.1	0.0375	0.7342
3	7	5	7	-1.218	1.5767	155	-0.77	0.441	1
3	7	3	8	0.9555	1.8013	155.4	0.53	0.5966	1
3	7	4	8	-2.9908	1.7282	155.4	-1.73	0.0855	0.9203
3	7	5	8	0.0806	2.1304	155.3	0.04	0.9699	1
3	7	3	9	3.4855	2.4938	155.9	1.4	0.1642	0.9865
3	7	4	9	-3.343	2.231	156.1	-1.5	0.136	0.9748
3	7	5	9	5.7522	3.0192	155.6	1.91	0.0586	0.847
4	7	5	7	1.9414	1.4821	155	1.31	0.1922	0.9927
4	7	3	8	4.1148	1.7087	155.3	2.41	0.0172	0.5128
4	7	4	8	0.1685	1.6313	155.4	0.1	0.9179	1
4	7	5	8	3.2399	2.0526	155.2	1.58	0.1165	0.9609
4	7	3	9	6.6449	2.4244	155.9	2.74	0.0068	0.2909
4	7	4	9	-0.1837	2.1531	156.1	-0.09	0.9321	1
4	7	5	9	8.9116	2.9621	155.6	3.01	0.0031	0.1621
5	7	3	8	2.1734	1.7771	155.4	1.22	0.2232	0.9963
5	7	4	8	-1.7729	1.7032	155.4	-1.04	0.2995	0.9993
5	7	5	8	1.2986	2.1101	155.3	0.62	0.5392	1
5	7	3	9	4.7035	2.4829	155.9	1.89	0.06	0.8524
5	7	4	9	-2.1251	2.2188	156.1	-0.96	0.3397	0.9997
5	7	5	9	6.9702	3.0102	155.7	2.32	0.0219	0.5807
3	8	4	8	-3.9463	1.8337	155	-2.15	0.0329	0.6978
3	8	5	8	-0.8749	2.2169	155	-0.39	0.6936	1
3	8	3	9	2.5301	2.5641	155.5	0.99	0.3253	0.9996
3	8	4	9	-4.2985	2.3094	155.6	-1.86	0.0646	0.8682
3	8	5	9	4.7967	3.0776	155.4	1.56	0.1211	0.9648
4	8	5	8	3.0714	2.1577	155	1.42	0.1566	0.984
4	8	3	9	6.4764	2.5098	155.5	2.58	0.0108	0.3913
4	8	4	9	-0.3522	2.2489	155.7	-0.16	0.8758	1
4	8	5	9	8.743	3.0325	155.4	2.88	0.0045	0.2162
5	8	3	9	3.4049	2.802	155.4	1.22	0.2261	0.9965
5	8	4	9	-3.4236	2.5709	155.5	-1.33	0.1849	0.9914
5	8	5	9	5.6716	3.2784	155.3	1.73	0.0856	0.9205
3	9	4	9	-6.8286	2.7293	155	-2.5	0.0134	0.4454
3	9	5	9	2.2667	3.404	155	0.67	0.5065	1
4	9	5	9	9.0952	3.2165	155	2.83	0.0053	0.2436
Tukey-Kramer Grouping
for Month(age) Least
Squares Means (Alpha=0.05)
LS-means with the
same letter are
not significantly
different.
Month	age	Estimate
4	5	87.8994	A
			A
4	9	87.2871	A
			A
4	7	87.1034	A
			A
5	5	86.9619	A
			A
4	8	86.9349	A
			A
4	6	86.7641	A
			A
5	7	85.162	A
			A
3	7	83.944	A
			A
5	8	83.8634	A
			A
3	8	82.9885	A
			A
3	5	82.7029	A
			A
5	6	81.9087	A
			A
3	6	81.4041	A
			A
3	9	80.4585	A
			A
5	9	78.1918	A
‘Hawk test Age and Month(age), including Year of sampling as covariates, and temporal trends as autoregressive of the first order’
The GLIMMIX Procedure
Model Information
Data Set	WORK.HAWK
Response Variable	T_mot_pc
Response Distribution	Gaussian
Link Function	Identity
Variance Function	Default
Variance Matrix	Not blocked
Estimation Technique	Restricted Maximum Likelihood
Degrees of Freedom Method	Kenward-Roger
Fixed Effects SE Adjustment	Kenward-Roger
Class Level Information
Class	Levels	Values
ID	3	A B C
Month	3	3 4 5
Year	3	2012 2013 2014
age	5	5 6 7 8 9
Number of Observations Read	172
Number of Observations Used	172
Dimensions
G-side Cov. Parameters	5
R-side Cov. Parameters	1
Columns in X	21
Columns in Z	27
Subjects (Blocks in V)	1
Max Obs per Subject	172
Optimization Information
Optimization Technique	Dual Quasi-Newton
Parameters in Optimization	5
Lower Boundaries	5
Upper Boundaries	2
Fixed Effects	Profiled
Residual Variance	Profiled
Starting From	Data
Iteration History
Iteration	Restarts	Evaluations	Objective	Change	Max
			Function		Gradient
0	0	4	870.218	.	3.9625
1	0	3	867.294	2.9237	1.99385
2	0	3	867.027	0.26691	0.184917
3	0	4	867.016	0.0116997	0.029572
4	0	2	867.015	0.00020502	0.007039
5	0	2	867.015	1.296e-05	0.000206
6	0	3	867.015	1e-08	1.492e-06
Convergence criterion (GCONV=1E-8) satisfied.
Estimated G matrix is not positive definite.
Fit Statistics
-2 Res Log Likelihood	867.02
AIC (smaller is better)	875.02
AICC (smaller is better)	875.28
BIC (smaller is better)	873.45
CAIC (smaller is better)	877.45
HQIC (smaller is better)	870.82
Generalized Chi-Square	1761.63
Gener. Chi-Square / DF	11.22
Covariance Parameter Estimates
Cov Parm	Subject	Estimate	Standard
			Error
Variance	ID	0	.
AR(1)	ID	0.4924	.
Variance	ID	0	.
AR(1)	ID	0	.
ID		10.985	11.3532
Residual		11.2206	1.2746
Type III Tests of Fixed Effects
Effect	Num DF	Den DF	F Value	Pr > F
age	4	156.1	16.35	<.0001
Month(age)	10	155	35.3	<.0001
age Least Squares Means
age	Estimate	Standard	DF	t Value	Pr > |t|
		Error
5	59.4347	2.0923	2.649	28.41	0.0002
6	65.9409	1.9969	2.213	33.02	0.0005
7	62.0741	1.9654	2.083	31.58	0.0008
8	61.4471	2.0212	2.326	30.4	0.0004
9	60.386	2.184	3.137	27.65	<.0001
Differences of age Least Squares Means
Adjustment for Multiple Comparisons: Tukey-Kramer
age	age	Estimate	Standard Error	DF	t Value	Pr > |t|	Adj P
5	6	-6.5062	0.9375	155.9	-6.94	<.0001	<.0001
5	7	-2.6395	0.937	156.5	-2.82	0.0055	0.0429
5	8	-2.0125	1.1623	156.9	-1.73	0.0853	0.4178
5	9	-0.9514	1.4666	157	-0.65	0.5175	0.9667
6	7	3.8668	0.7143	155.9	5.41	<.0001	<.0001
6	8	4.4938	0.8965	156.6	5.01	<.0001	<.0001
6	9	5.5549	1.3037	157	4.26	<.0001	0.0003
7	8	0.627	0.8013	155.8	0.78	0.4351	0.9354
7	9	1.6881	1.1589	156.7	1.46	0.1472	0.5921
8	9	1.0611	1.1934	156.1	0.89	0.3753	0.9006
Tukey-Kramer Grouping
for age Least Squares
Means (Alpha=0.05)
LS-means with the
same letter are
not significantly
different.
age	Estimate
6	65.9409		A
7	62.0741		B
			B
8	61.4471	C	B
		C	B
9	60.386	C	B
		C
5	59.4347	C
Month(age) Least Squares Means
Month	age	Estimate	Standard	DF	t Value	Pr > |t|
			Error
3	5	49.7615	2.3433	4.164	21.24	<.0001
4	5	62.7358	2.3001	3.867	27.28	<.0001
5	5	65.8067	2.3001	3.867	28.61	<.0001
3	6	65.7425	2.1594	3.025	30.44	<.0001
4	6	67.4123	2.1042	2.729	32.04	0.0001
5	6	64.6679	2.106	2.736	30.71	0.0001
3	7	56.8336	2.0796	2.611	27.33	0.0003
4	7	64.3849	2.0426	2.431	31.52	0.0003
5	7	65.0039	2.0706	2.566	31.39	0.0002
3	8	53.9896	2.1562	3.011	25.04	0.0001
4	8	65.609	2.125	2.841	30.87	0.0001
5	8	64.7427	2.3059	3.933	28.08	<.0001
3	9	48.0002	2.4842	5.237	19.32	<.0001
4	9	65.8478	2.3516	4.213	28	<.0001
5	9	67.31	2.769	8.027	24.31	<.0001
Differences of Month(age) Least Squares Means
Adjustment for Multiple Comparisons: Tukey-Kramer
Month	age	Month	age	Estimate	Standard Error	DF	t Value	Pr > |t|	Adj P
3	5	4	5	-12.9743	1.7336	155	-7.48	<.0001	<.0001
3	5	5	5	-16.0452	1.7336	155	-9.26	<.0001	<.0001
3	5	3	6	-15.981	1.6332	155.3	-9.78	<.0001	<.0001
3	5	4	6	-17.6509	1.571	155.4	-11.24	<.0001	<.0001
3	5	5	6	-14.9064	1.5503	155.3	-9.62	<.0001	<.0001
3	5	3	7	-7.0721	1.5618	155.6	-4.53	<.0001	0.0011
3	5	4	7	-14.6234	1.5229	155.7	-9.6	<.0001	<.0001
3	5	5	7	-15.2424	1.553	155.6	-9.81	<.0001	<.0001
3	5	3	8	-4.2281	1.7397	156.2	-2.43	0.0162	0.4966
3	5	4	8	-15.8475	1.7016	156.2	-9.31	<.0001	<.0001
3	5	5	8	-14.9813	1.9227	156	-7.79	<.0001	<.0001
3	5	3	9	1.7613	2.1599	156.4	0.82	0.416	1
3	5	4	9	-16.0864	2.006	156.6	-8.02	<.0001	<.0001
3	5	5	9	-17.5485	2.4822	156.1	-7.07	<.0001	<.0001
4	5	5	5	-3.0709	1.6749	155	-1.83	0.0686	0.8806
4	5	3	6	-3.0067	1.5707	155.3	-1.91	0.0574	0.8424
4	5	4	6	-4.6765	1.5059	155.5	-3.11	0.0023	0.1278
4	5	5	6	-1.9321	1.4842	155.3	-1.3	0.1949	0.9931
4	5	3	7	5.9022	1.4963	155.7	3.94	0.0001	0.0099
4	5	4	7	-1.6491	1.4556	155.8	-1.13	0.259	0.9983
4	5	5	7	-2.2681	1.4871	155.7	-1.53	0.1292	0.9706
4	5	3	8	8.7462	1.6811	156.2	5.2	<.0001	<.0001
4	5	4	8	-2.8732	1.6416	156.3	-1.75	0.082	0.9135
4	5	5	8	-2.0069	1.8699	156.1	-1.07	0.2848	0.9991
4	5	3	9	14.7356	2.113	156.5	6.97	<.0001	<.0001
4	5	4	9	-3.112	1.9554	156.6	-1.59	0.1135	0.9582
4	5	5	9	-4.5742	2.4415	156.2	-1.87	0.0629	0.8625
5	5	3	6	0.06424	1.5707	155.3	0.04	0.9674	1
5	5	4	6	-1.6056	1.5059	155.5	-1.07	0.288	0.9991
5	5	5	6	1.1388	1.4842	155.3	0.77	0.4441	1
5	5	3	7	8.9731	1.4963	155.7	6	<.0001	<.0001
5	5	4	7	1.4218	1.4556	155.8	0.98	0.3302	0.9997
5	5	5	7	0.8028	1.4871	155.7	0.54	0.5901	1
5	5	3	8	11.8171	1.6811	156.2	7.03	<.0001	<.0001
5	5	4	8	0.1977	1.6416	156.3	0.12	0.9043	1
5	5	5	8	1.064	1.8699	156.1	0.57	0.5702	1
5	5	3	9	17.8065	2.113	156.5	8.43	<.0001	<.0001
5	5	4	9	-0.04114	1.9554	156.6	-0.02	0.9832	1
5	5	5	9	-1.5033	2.4415	156.2	-0.62	0.539	1
3	6	4	6	-1.6699	1.28	155	-1.3	0.194	0.993
3	6	5	6	1.0745	1.28	155	0.84	0.4025	0.9999
3	6	3	7	8.9089	1.2827	155.3	6.95	<.0001	<.0001
3	6	4	7	1.3576	1.2266	155.4	1.11	0.2701	0.9987
3	6	5	7	0.7386	1.2663	155.3	0.58	0.5606	1
3	6	3	8	11.7528	1.4283	155.8	8.23	<.0001	<.0001
3	6	4	8	0.1335	1.3823	155.8	0.1	0.9232	1
3	6	5	8	0.9997	1.6469	155.6	0.61	0.5447	1
3	6	3	9	17.7423	1.9432	156.3	9.13	<.0001	<.0001
3	6	4	9	-0.1054	1.7706	156.5	-0.06	0.9526	1
3	6	5	9	-1.5676	2.2961	156	-0.68	0.4958	1
4	6	5	6	2.7444	1.1877	155	2.31	0.0222	0.5843
4	6	3	7	10.5787	1.1891	155.3	8.9	<.0001	<.0001
4	6	4	7	3.0274	1.1272	155.4	2.69	0.008	0.3236
4	6	5	7	2.4085	1.1706	155.3	2.06	0.0413	0.7603
4	6	3	8	13.4227	1.3359	155.8	10.05	<.0001	<.0001
4	6	4	8	1.8033	1.2867	155.8	1.4	0.1631	0.9861
4	6	5	8	2.6696	1.5675	155.6	1.7	0.0906	0.9292
4	6	3	9	19.4121	1.8796	156.3	10.33	<.0001	<.0001
4	6	4	9	1.5645	1.7005	156.5	0.92	0.359	0.9998
4	6	5	9	0.1023	2.2425	156	0.05	0.9637	1
5	6	3	7	7.8343	1.1888	155.3	6.59	<.0001	<.0001
5	6	4	7	0.283	1.1291	155.5	0.25	0.8024	1
5	6	5	7	-0.3359	1.1718	155.3	-0.29	0.7747	1
5	6	3	8	10.6783	1.3535	155.9	7.89	<.0001	<.0001
5	6	4	8	-0.9411	1.3048	156	-0.72	0.4718	1
5	6	5	8	-0.07481	1.5824	155.7	-0.05	0.9624	1
5	6	3	9	16.6677	1.8857	156.4	8.84	<.0001	<.0001
5	6	4	9	-1.1799	1.7072	156.6	-0.69	0.4905	1
5	6	5	9	-2.6421	2.2476	156.1	-1.18	0.2416	0.9975
3	7	4	7	-7.5513	1.0822	155	-6.98	<.0001	<.0001
3	7	5	7	-8.1703	1.1331	155	-7.21	<.0001	<.0001
3	7	3	8	2.844	1.2944	155.4	2.2	0.0295	0.6664
3	7	4	8	-8.7754	1.2419	155.4	-7.07	<.0001	<.0001
3	7	5	8	-7.9091	1.5309	155.3	-5.17	<.0001	<.0001
3	7	3	9	8.8334	1.7919	155.9	4.93	<.0001	0.0002
3	7	4	9	-9.0142	1.6031	156	-5.62	<.0001	<.0001
3	7	5	9	-10.4764	2.1696	155.6	-4.83	<.0001	0.0003
4	7	5	7	-0.619	1.0651	155	-0.58	0.562	1
4	7	3	8	10.3953	1.2279	155.3	8.47	<.0001	<.0001
4	7	4	8	-1.2241	1.1723	155.3	-1.04	0.298	0.9993
4	7	5	8	-0.3578	1.475	155.2	-0.24	0.8086	1
4	7	3	9	16.3847	1.7421	155.8	9.41	<.0001	<.0001
4	7	4	9	-1.4629	1.5471	156	-0.95	0.3458	0.9998
4	7	5	9	-2.9251	2.1286	155.6	-1.37	0.1714	0.9884
5	7	3	8	11.0143	1.2771	155.4	8.62	<.0001	<.0001
5	7	4	8	-0.6051	1.2239	155.4	-0.49	0.6217	1
5	7	5	8	0.2611	1.5164	155.3	0.17	0.8635	1
5	7	3	9	17.0037	1.7841	155.9	9.53	<.0001	<.0001
5	7	4	9	-0.844	1.5943	156.1	-0.53	0.5973	1
5	7	5	9	-2.3061	2.1631	155.6	-1.07	0.288	0.9991
3	8	4	8	-11.6194	1.3178	155	-8.82	<.0001	<.0001
3	8	5	8	-10.7531	1.5931	155	-6.75	<.0001	<.0001
3	8	3	9	5.9894	1.8426	155.5	3.25	0.0014	0.0874
3	8	4	9	-11.8582	1.6595	155.6	-7.15	<.0001	<.0001
3	8	5	9	-13.3204	2.2116	155.4	-6.02	<.0001	<.0001
4	8	5	8	0.8663	1.5506	155	0.56	0.5772	1
4	8	3	9	17.6088	1.8036	155.5	9.76	<.0001	<.0001
4	8	4	9	-0.2388	1.6161	155.6	-0.15	0.8827	1
4	8	5	9	-1.701	2.1792	155.3	-0.78	0.4362	1
5	8	3	9	16.7426	2.0135	155.4	8.32	<.0001	<.0001
5	8	4	9	-1.1051	1.8475	155.5	-0.6	0.5506	1
5	8	5	9	-2.5673	2.3559	155.3	-1.09	0.2775	0.9989
3	9	4	9	-17.8477	1.9614	155	-9.1	<.0001	<.0001
3	9	5	9	-19.3098	2.4463	155	-7.89	<.0001	<.0001
4	9	5	9	-1.4622	2.3115	155	-0.63	0.528	1
Tukey-Kramer Grouping
for Month(age) Least
Squares Means (Alpha=0.05)
LS-means with the
same letter are not
significantly different.
Month	age	Estimate
4	6	67.4123		A
				A
5	9	67.31		A
				A
4	9	65.8478		A
				A
5	5	65.8067		A
				A
3	6	65.7425		A
				A
4	8	65.609		A
				A
5	7	65.0039		A
				A
5	8	64.7427		A
				A
5	6	64.6679		A
				A
4	7	64.3849		A
				A
4	5	62.7358		A
3	7	56.8336		B
				B
3	8	53.9896	C	B
			C
3	5	49.7615	C
			C
3	9	48.0002	C
‘Hawk test Age and Month(age), including Year of sampling as covariates, and temporal trends as autoregressive of the first order’
The GLIMMIX Procedure
Model Information
Data Set	WORK.HAWK
Response Variable	T_viable_pc
Response Distribution	Gaussian
Link Function	Identity
Variance Function	Default
Variance Matrix	Not blocked
Estimation Technique	Restricted Maximum Likelihood
Degrees of Freedom Method	Kenward-Roger
Fixed Effects SE Adjustment	Kenward-Roger
Class Level Information
Class	Levels	Values
ID	3	A B C
Month	3	3 4 5
Year	3	2012 2013 2014
age	5	5 6 7 8 9
Number of Observations Read	172
Number of Observations Used	172
Dimensions
G-side Cov. Parameters	5
R-side Cov. Parameters	1
Columns in X	21
Columns in Z	27
Subjects (Blocks in V)	1
Max Obs per Subject	172
Optimization Information
Optimization Technique	Dual Quasi-Newton
Parameters in Optimization	5
Lower Boundaries	5
Upper Boundaries	2
Fixed Effects	Profiled
Residual Variance	Profiled
Starting From	Data
Iteration History
Iteration	Restarts	Evaluations	Objective	Change	Max
			Function		Gradient
0	0	4	899.455	.	2.98537
1	0	3	896.293	3.16228	2.10738
2	0	4	896.117	0.176077	0.425007
3	0	5	896.017	0.099985	0.101264
4	0	3	896.014	0.00273398	0.004444
5	0	2	896.014	4.55e-06	0.000498
6	0	3	896.014	6e-08	2.142e-06
Convergence criterion (GCONV=1E-8) satisfied.
Estimated G matrix is not positive definite.
Fit Statistics
-2 Res Log Likelihood	896.01
AIC (smaller is better)	904.01
AICC (smaller is better)	904.28
BIC (smaller is better)	902.45
CAIC (smaller is better)	906.45
HQIC (smaller is better)	899.82
Generalized Chi-Square	2120.6
Gener. Chi-Square / DF	13.51
Covariance Parameter Estimates
Cov Parm	Subject	Estimate	Standard
			Error
Variance	ID	7.5e-16	.
AR(1)	ID	0.1677	.
Variance	ID	0	.
AR(1)	ID	0	.
ID		12.444	12.9282
Residual		13.507	1.5344
Type III Tests of Fixed Effects
Effect	Num DF	Den DF	F Value	Pr > F
age	4	156.1	2.3	0.0615
Month(age)	10	155	4.06	<.0001
age Least Squares Means
age	Estimate	Standard	DF	t Value	Pr > |t|
		Error
5	68.2968	2.2384	2.673	30.51	0.0002
6	66.3109	2.1309	2.212	31.12	0.0006
7	67.9018	2.0952	2.075	32.41	0.0008
8	67.3835	2.1583	2.331	31.22	0.0004
9	65.4022	2.3416	3.191	27.93	<.0001
Differences of age Least Squares Means
Adjustment for Multiple Comparisons: Tukey-Kramer
age	age	Estimate	Standard Error	DF	t Value	Pr > |t|	Adj P
5	6	1.9859	1.0287	155.9	1.93	0.0554	0.3057
5	7	0.395	1.0283	156.6	0.38	0.7014	0.9953
5	8	0.9132	1.2757	157	0.72	0.4751	0.9526
5	9	2.8946	1.6098	157	1.8	0.0741	0.3784
6	7	-1.5909	0.7838	155.9	-2.03	0.0441	0.2568
6	8	-1.0727	0.9838	156.7	-1.09	0.2773	0.8113
6	9	0.9087	1.431	157	0.64	0.5264	0.9691
7	8	0.5182	0.8793	155.9	0.59	0.5564	0.9765
7	9	2.4996	1.2718	156.7	1.97	0.0511	0.2878
8	9	1.9813	1.3096	156.1	1.51	0.1323	0.5556
Tukey-Kramer Grouping
for age Least Squares
Means (Alpha=0.05)
LS-means with the
same letter are
not significantly
different.
age	Estimate
5	68.2968	A
		A
7	67.9018	A
		A
8	67.3835	A
		A
6	66.3109	A
		A
9	65.4022	A
Month(age) Least Squares Means
Month	age	Estimate	Standard	DF	t Value	Pr > |t|
			Error
3	5	65.3902	2.52	4.29	25.95	<.0001
4	5	70.2032	2.4717	3.972	28.4	<.0001
5	5	69.2968	2.4717	3.972	28.04	<.0001
3	6	64.5587	2.3138	3.074	27.9	<.0001
4	6	69.4772	2.2517	2.758	30.86	0.0001
5	6	64.8967	2.2537	2.767	28.8	0.0002
3	7	66.9932	2.224	2.634	30.12	0.0002
4	7	69.1695	2.1823	2.442	31.7	0.0003
5	7	67.5426	2.2139	2.586	30.51	0.0002
3	8	66.2554	2.3102	3.059	28.68	<.0001
4	8	69.1932	2.2751	2.878	30.41	0.0001
5	8	66.702	2.4781	4.044	26.92	<.0001
3	9	64.3851	2.6776	5.443	24.05	<.0001
4	9	69.0987	2.5294	4.342	27.32	<.0001
5	9	62.7227	2.9951	8.454	20.94	<.0001
Differences of Month(age) Least Squares Means
Adjustment for Multiple Comparisons: Tukey-Kramer
Month	age	Month	age	Estimate	Standard Error	DF	t Value	Pr > |t|	Adj P
3	5	4	5	-4.813	1.9021	155	-2.53	0.0124	0.4255
3	5	5	5	-3.9066	1.9021	155	-2.05	0.0417	0.7626
3	5	3	6	0.8316	1.792	155.3	0.46	0.6433	1
3	5	4	6	-4.087	1.7237	155.4	-2.37	0.019	0.54
3	5	5	6	0.4936	1.701	155.3	0.29	0.7721	1
3	5	3	7	-1.603	1.7137	155.6	-0.94	0.351	0.9998
3	5	4	7	-3.7793	1.671	155.8	-2.26	0.0251	0.6201
3	5	5	7	-2.1523	1.7041	155.7	-1.26	0.2085	0.9949
3	5	3	8	-0.8652	1.9091	156.2	-0.45	0.651	1
3	5	4	8	-3.8029	1.8672	156.3	-2.04	0.0434	0.7733
3	5	5	8	-1.3117	2.1098	156.1	-0.62	0.535	1
3	5	3	9	1.0051	2.3703	156.5	0.42	0.6721	1
3	5	4	9	-3.7085	2.2014	156.6	-1.68	0.0941	0.9348
3	5	5	9	2.6675	2.7238	156.2	0.98	0.3289	0.9997
4	5	5	5	0.9064	1.8376	155	0.49	0.6225	1
4	5	3	6	5.6446	1.7234	155.4	3.28	0.0013	0.0817
4	5	4	6	0.726	1.6523	155.5	0.44	0.661	1
4	5	5	6	5.3065	1.6285	155.3	3.26	0.0014	0.0855
4	5	3	7	3.21	1.6418	155.7	1.96	0.0524	0.8207
4	5	4	7	1.0337	1.5972	155.8	0.65	0.5185	1
4	5	5	7	2.6607	1.6317	155.7	1.63	0.105	0.9492
4	5	3	8	3.9478	1.8448	156.3	2.14	0.0339	0.7061
4	5	4	8	1.01	1.8015	156.4	0.56	0.5758	1
4	5	5	8	3.5013	2.0519	156.1	1.71	0.0899	0.9282
4	5	3	9	5.8181	2.3188	156.5	2.51	0.0131	0.4403
4	5	4	9	1.1045	2.1459	156.7	0.51	0.6075	1
4	5	5	9	7.4805	2.6791	156.2	2.79	0.0059	0.2623
5	5	3	6	4.7381	1.7234	155.4	2.75	0.0067	0.2861
5	5	4	6	-0.1804	1.6523	155.5	-0.11	0.9132	1
5	5	5	6	4.4001	1.6285	155.3	2.7	0.0077	0.3138
5	5	3	7	2.3036	1.6418	155.7	1.4	0.1626	0.986
5	5	4	7	0.1273	1.5972	155.8	0.08	0.9366	1
5	5	5	7	1.7543	1.6317	155.7	1.08	0.284	0.9991
5	5	3	8	3.0414	1.8448	156.3	1.65	0.1012	0.9447
5	5	4	8	0.1036	1.8015	156.4	0.06	0.9542	1
5	5	5	8	2.5949	2.0519	156.1	1.26	0.2079	0.9948
5	5	3	9	4.9117	2.3188	156.5	2.12	0.0357	0.7208
5	5	4	9	0.1981	2.1459	156.7	0.09	0.9266	1
5	5	5	9	6.5741	2.6791	156.2	2.45	0.0152	0.4796
3	6	4	6	-4.9186	1.4044	155	-3.5	0.0006	0.0423
3	6	5	6	-0.338	1.4044	155	-0.24	0.8101	1
3	6	3	7	-2.4345	1.4074	155.3	-1.73	0.0856	0.9205
3	6	4	7	-4.6108	1.3458	155.4	-3.43	0.0008	0.0532
3	6	5	7	-2.9839	1.3894	155.3	-2.15	0.0333	0.7008
3	6	3	8	-1.6968	1.5672	155.8	-1.08	0.2806	0.999
3	6	4	8	-4.6345	1.5168	155.9	-3.06	0.0026	0.1447
3	6	5	8	-2.1433	1.8071	155.6	-1.19	0.2374	0.9973
3	6	3	9	0.1735	2.1324	156.4	0.08	0.9352	1
3	6	4	9	-4.54	1.9431	156.5	-2.34	0.0207	0.5653
3	6	5	9	1.836	2.5196	156	0.73	0.4673	1
4	6	5	6	4.5806	1.3031	155	3.52	0.0006	0.0407
4	6	3	7	2.484	1.3047	155.3	1.9	0.0588	0.8477
4	6	4	7	0.3077	1.2368	155.4	0.25	0.8038	1
4	6	5	7	1.9347	1.2844	155.3	1.51	0.134	0.9736
4	6	3	8	3.2218	1.4659	155.8	2.2	0.0294	0.6658
4	6	4	8	0.2841	1.4119	155.9	0.2	0.8408	1
4	6	5	8	2.7753	1.72	155.6	1.61	0.1087	0.9533
4	6	3	9	5.0921	2.0626	156.4	2.47	0.0146	0.4689
4	6	4	9	0.3786	1.8662	156.6	0.2	0.8395	1
4	6	5	9	6.7545	2.4608	156.1	2.74	0.0068	0.2886
5	6	3	7	-2.0965	1.3043	155.4	-1.61	0.11	0.9547
5	6	4	7	-4.2728	1.2389	155.5	-3.45	0.0007	0.0497
5	6	5	7	-2.6459	1.2857	155.3	-2.06	0.0413	0.76
5	6	3	8	-1.3587	1.4852	156	-0.91	0.3617	0.9999
5	6	4	8	-4.2965	1.4318	156.1	-3	0.0031	0.1651
5	6	5	8	-1.8053	1.7363	155.7	-1.04	0.3001	0.9994
5	6	3	9	0.5115	2.0693	156.4	0.25	0.8051	1
5	6	4	9	-4.202	1.8736	156.7	-2.24	0.0263	0.6338
5	6	5	9	2.174	2.4664	156.1	0.88	0.3794	0.9999
3	7	4	7	-2.1763	1.1874	155	-1.83	0.0687	0.8809
3	7	5	7	-0.5493	1.2432	155	-0.44	0.6592	1
3	7	3	8	0.7378	1.4203	155.4	0.52	0.6042	1
3	7	4	8	-2.2	1.3626	155.4	-1.61	0.1084	0.9531
3	7	5	8	0.2913	1.6797	155.3	0.17	0.8626	1
3	7	3	9	2.6081	1.9663	155.9	1.33	0.1866	0.9917
3	7	4	9	-2.1055	1.7591	156.1	-1.2	0.2332	0.997
3	7	5	9	4.2705	2.3806	155.6	1.79	0.0748	0.8971
4	7	5	7	1.6269	1.1686	155	1.39	0.1658	0.9869
4	7	3	8	2.9141	1.3472	155.3	2.16	0.0321	0.6903
4	7	4	8	-0.02367	1.2863	155.4	-0.02	0.9853	1
4	7	5	8	2.4676	1.6184	155.2	1.52	0.1294	0.9707
4	7	3	9	4.7844	1.9115	155.9	2.5	0.0133	0.4447
4	7	4	9	0.07082	1.6977	156.1	0.04	0.9668	1
4	7	5	9	6.4468	2.3356	155.6	2.76	0.0065	0.2799
5	7	3	8	1.2871	1.4012	155.4	0.92	0.3597	0.9998
5	7	4	8	-1.6506	1.3429	155.4	-1.23	0.2209	0.9961
5	7	5	8	0.8406	1.6638	155.3	0.51	0.6141	1
5	7	3	9	3.1574	1.9577	155.9	1.61	0.1088	0.9535
5	7	4	9	-1.5561	1.7495	156.1	-0.89	0.3751	0.9999
5	7	5	9	4.8199	2.3735	155.7	2.03	0.044	0.7769
3	8	4	8	-2.9377	1.4458	155	-2.03	0.0439	0.7762
3	8	5	8	-0.4465	1.7479	155	-0.26	0.7987	1
3	8	3	9	1.8703	2.0218	155.5	0.93	0.3564	0.9998
3	8	4	9	-2.8433	1.8209	155.6	-1.56	0.1204	0.9642
3	8	5	9	3.5327	2.4266	155.4	1.46	0.1475	0.9804
4	8	5	8	2.4912	1.7013	155	1.46	0.1451	0.9794
4	8	3	9	4.808	1.9789	155.5	2.43	0.0163	0.4972
4	8	4	9	0.09449	1.7732	155.7	0.05	0.9576	1
4	8	5	9	6.4705	2.391	155.4	2.71	0.0076	0.3113
5	8	3	9	2.3168	2.2093	155.4	1.05	0.296	0.9993
5	8	4	9	-2.3967	2.0271	155.5	-1.18	0.2389	0.9974
5	8	5	9	3.9793	2.5849	155.3	1.54	0.1257	0.9682
3	9	4	9	-4.7136	2.152	155	-2.19	0.03	0.6712
3	9	5	9	1.6624	2.684	155	0.62	0.5366	1
4	9	5	9	6.376	2.5361	155	2.51	0.013	0.4369
Conservative Tukey-Kramer Grouping for Month(age) Least Squares Means (Alpha=0.05)
LS-means with the
same letter are
not significantly
different.
Month	age	Estimate
4	5	70.2032	A
			A
4	6	69.4772	A
			A
5	5	69.2968	A
			A
4	8	69.1932	A
			A
4	7	69.1695	A
			A
4	9	69.0987	A
			A
5	7	67.5426	A
			A
3	7	66.9932	A
			A
5	8	66.702	A
			A
3	8	66.2554	A
			A
3	5	65.3902	A
			A
5	6	64.8967	A
			A
3	6	64.5587	A
			A
3	9	64.3851	A
			A
5	9	62.7227	A
The LINES display does not reflect all significant comparisons. The following additional pairs are significantly different: (4 6,5 6), (4 6,3 6), (4 7,5 6).

## Sheet: Tab fixed effect
	Type III Tests of Fixed Effects
Response Variable	Effect	Num DF	Den DF	F Value	Pr > F
Ejaculate volume [μL]	Age	4	6.612	0.04	0.9968
	Month(Age)	10	153.4	167.26	<.0001
Sperm Concentration [cells ×106 mL-1]	Age	4	155.4	5.56	0.0003
	Month(Age)	10	155	74.78	<.0001
Sperm motility [%]	Age	4	156.1	15.23	<.0001
	Month(Age)	10	155	38.66	<.0001
Sperm viability [%]	Age	4	156.1	2.43	0.0503
	Month(Age)	10	155	3.74	0.0002

## Sheet: Means, SD and counts
		Valori									Valori									Valori
age	Month	Average of vol	Average of conc	Average of mot_pc	Average of viable_pc	Average of T_mot_pc	Average of T_ viable_pc		age	Month	Standard Dev. of vol	Standard Dev. of conc	Standard Dev. of mot_pc	Standard Dev. of viable_pc	Standard Dev. of T_mot_pc	Standard Dev. of T_ viable_pc		age	Month	Count of vol	Count of conc	Count of mot_pc	Count of viable_pc	Count of T_mot_pc	Count of T_ viable_pc
5	3	48.8571	40.7143	64.4286	86.4286	53.4106	68.3994		5	3	10.0404	3.03942	3.77964	1.20515	2.27828	1.00482		5	3	7	7	7	7	7	7
	4	81.375	104	83.875	91.625	66.3849	73.2124			4	9.31876	9.47176	2.64237	1.18773	2.07073	1.22132			4	8	8	8	8	8	8
	5	34.875	24.625	87.5625	90.6875	69.4558	72.306			5	10.0986	2.55999	2.73127	1.81142	2.45229	1.84873			5	8	8	8	8	8	8
6	3	39.7917	37.75	84.6667	83.8333	67.0698	66.46		6	3	8.10572	9.60232	3.70708	4.34497	2.85596	3.38197		6	3	12	12	12	12	12	12
	4	83.5938	78.25	86.0312	89.0312	68.4494	71.2401			4	6.68884	24.1868	5.81512	6.65449	4.815	5.46156			4	16	16	16	16	16	16
	5	29.0938	24.4375	83.5	84.5	66.2855	66.9365			5	4.86559	3.75888	5.34166	3.82971	4.12907	2.85979			5	16	16	16	16	16	16
7	3	38.5882	31.7059	70.0588	84.3824	57.2629	67.3472		7	3	9.96123	11.7886	11.8887	7.67815	7.63442	6.24832		7	3	17	17	17	17	17	17
	4	73.5	45.3636	81.4545	87.2727	64.5508	69.3063			4	13.8487	27.6518	2.96371	4.17683	2.12758	3.38929			4	22	22	22	22	22	22
	5	26.0833	26.7222	82.4444	85.6389	65.3541	67.921			5	8.32298	7.85011	4.09048	4.66465	3.01683	3.49139			5	18	18	18	18	18	18
8	3	33.875	24.2667	62.4167	81.625	52.3034	65.1338		8	3	7.11952	8.61176	8.45801	8.29875	5.08365	6.24031		8	3	12	12	12	12	12	12
	4	71.7143	51.7857	80.5	85.5	63.903	68.0169			4	13.0055	11.6102	4.10909	5.80119	2.9562	4.8825			4	14	14	14	14	14	14
	5	20.1429	23.1429	79.4286	82.4286	63.0368	65.5257			5	2.71898	1.77281	1.27242	7.02038	0.90396	5.04256			5	7	7	7	7	7	7
9	3	23.4	18	50.6	75.6	45.3455	60.5824		9	3	6.7768	4.52769	5.94138	6.42651	3.41397	4.51863		9	3	5	5	5	5	5	5
	4	59.5714	42.4286	79.5714	82.4286	63.1932	65.296			4	4.15761	1.90238	3.40867	3.15474	2.41729	2.45435			4	7	7	7	7	7	7
	5	20	21	81.6667	73.3333	64.6554	58.92			5	3.04138	1.73205	1.1547	2.08167	0.861331	1.34224			5	3	3	3	3	3	3
Month	(Tutto)								Month	(Tutto)								Month	(Tutto)
	Valori									Valori									Valori
age	Average of vol	Average of conc	Average of mot_pc	Average of viable_pc	Average of T_mot_pc	Average of T_ viable_pc			age	Standard Dev. of vol	Standard Dev. of conc	Standard Dev. of mot_pc	Standard Dev. of viable_pc	Standard Dev. of T_mot_pc	Standard Dev. of T_ viable_pc			age	Count of vol	Count of conc	Count of mot_pc	Count of viable_pc	Count of T_mot_pc	Count of T_ viable_pc
5	55.3043	57.1304	79.2391	89.7174	63.5043	71.4323			5	22.3544	36.0824	10.5495	2.645	7.28068	2.48879			5	23	23	23	23	23	23
6	51.8295	47.6364	84.7386	85.9659	67.2863	68.3715			6	25.4732	28.4401	5.14385	5.564	4.1244	4.58607			6	44	44	44	44	44	44
7	48.114	35.4035	78.3684	85.8947	62.6309	68.2845			7	23.6226	20.31	8.8769	5.6083	5.8045	4.45895			7	57	57	57	57	57	57
8	47.0152	35.703	73.697	83.4394	59.5012	66.4401			8	24.0236	16.6601	10.3395	7.06417	6.5747	5.45424			8	33	33	33	33	33	33
9	39.6	30	70.3333	78.3333	57.5364	62.4496			9	19.9331	12.4039	14.9841	5.75285	9.26701	4.07902			9	15	15	15	15	15	15
age	(Tutto)								age	(Tutto)								age	(Tutto)
	Valori									Valori									Valori
Month	Average of vol	Average of conc	Average of mot_pc	Average of viable_pc	Average of T_mot_pc	Average of T_ viable_pc			Month	Standard Dev. of vol	Standard Dev. of conc	Standard Dev. of mot_pc	Standard Dev. of viable_pc	Standard Dev. of T_mot_pc	Standard Dev. of T_ viable_pc			Month	Count of vol	Count of conc	Count of mot_pc	Count of viable_pc	Count of T_mot_pc	Count of T_ viable_pc
3	37.717	31.2868	69.0566	83.0755	56.7274	66.146			3	10.5537	11.4283	12.9717	6.93611	8.35783	5.36169			3	53	53	53	53	53	53
4	75.0224	61.2537	82.4403	87.3358	65.4236	69.5461			4	12.8998	29.0675	4.5797	5.43096	3.60837	4.5378			4	67	67	67	67	67	67
5	27.2115	24.8846	83.1058	84.9231	65.9195	67.451			5	8.12244	5.35286	4.5313	5.67363	3.51425	4.31835			5	52	52	52	52	52	52
age	(Tutto)								age	(Tutto)								age	(Tutto)
Month	(Tutto)								Month	(Tutto)								Month	(Tutto)
	Valori									Valori									Valori
	Average of vol	Average of conc	Average of mot_pc	Average of viable_pc	Average of T_mot_pc	Average of T_ viable_pc				Standard Dev. of vol	Standard Dev. of conc	Standard Dev. of mot_pc	Standard Dev. of viable_pc	Standard Dev. of T_mot_pc	Standard Dev. of T_ viable_pc				Count of vol	Count of conc	Count of mot_pc	Count of viable_pc	Count of T_mot_pc	Count of T_ viable_pc
Totale	49.0727	41.0244	78.5174	85.2936	62.8939	67.865			Totale	23.8099	25.3636	10.2743	6.2302	6.85767	4.93221			Totale	172	172	172	172	172	172

## Sheet: Raw Data
ID	Month	Year	Year_Month	age	vol	conc	mot_pc	viable_pc	T_mot_pc	T_viable_pc
C	3	2012	2012_3	5	39.5	34	64	85.5	53.1301	67.6175
C	3	2012	2012_3	5	46.5	42	63	84.5	52.535	66.8151
C	3	2012	2012_3	5	67.5	41	64	87.5	53.1301	69.2952
C	3	2012	2012_3	5	42	42	70	87	56.7891	68.8657
C	3	2012	2012_3	5	43	41	69	86	56.1668	68.0272
C	3	2012	2012_3	5	57.5	42	60	86.5	50.7685	68.4432
C	3	2012	2012_3	5	46	43	61	88	51.3545	69.7321
B	3	2012	2012_3	6	46	34	81	79	64.1581	62.7253
B	3	2012	2012_3	6	49	34	82	91	64.8959	72.5424
B	3	2012	2012_3	6	25	33	84	85	66.4218	67.2135
B	3	2012	2012_3	6	46	33	83	86	65.6499	68.0272
B	3	2012	2012_3	6	36.5	33	76	82	60.6661	64.8959
B	3	2012	2012_3	6	34	33	85	84	67.2135	66.4218
C	3	2013	2013_3	6	50	36	87.5	86	69.2952	68.0272
C	3	2013	2013_3	6	31	35	86.5	76	68.4432	60.6661
C	3	2013	2013_3	6	33	57	87	78	68.8657	62.0279
C	3	2013	2013_3	6	37	59	88	88	69.7321	69.7321
C	3	2013	2013_3	6	43	36	87	86	68.8657	68.0272
C	3	2013	2013_3	6	47	30	89	85	70.6303	67.2135
A	3	2012	2012_3	7	25.5	17	61	76	51.3545	60.6661
A	3	2012	2012_3	7	22	22	65	73	53.7288	58.6936
A	3	2012	2012_3	7	37	17	55.5	78	48.1577	62.0279
A	3	2012	2012_3	7	29.5	13	64	73	53.1301	58.6936
A	3	2012	2012_3	7	27.5	18	57	80	49.0239	63.4349
B	3	2013	2013_3	7	31.5	30	70	82	56.7891	64.8959
B	3	2013	2013_3	7	42	31	55	88	47.8696	69.7321
B	3	2013	2013_3	7	43	27	52.5	81	46.433	64.1581
B	3	2013	2013_3	7	30	29	77	80	61.3418	63.4349
B	3	2013	2013_3	7	32.5	26	62	77	51.9433	61.3418
C	3	2014	2014_3	7	50	42	84	91.5	66.4218	73.0494
C	3	2014	2014_3	7	43.5	44	85	94	67.2135	75.8212
C	3	2014	2014_3	7	41	44	83	92	65.6499	73.5701
C	3	2014	2014_3	7	46	43	72	92.5	58.0519	74.1058
C	3	2014	2014_3	7	49	45	79	92	62.7253	73.5701
C	3	2014	2014_3	7	54	46	84	91.5	66.4218	73.0494
C	3	2014	2014_3	7	52	45	85	93	67.2135	74.6583
A	3	2013	2013_3	8	25	20	56	68	48.4461	55.5501
A	3	2013	2013_3	8	27	20	52	71	46.1462	57.4173
A	3	2013	2013_3	8	26	24	61	77	51.3545	61.3418
A	3	2013	2013_3	8	37	19	65	79	53.7288	62.7253
A	3	2013	2013_3	8	29.5	19	58	72	49.6034	58.0519
B	3	2014	2014_3	8	30	32	71	84.5	57.4173	66.8151
B	3	2014	2014_3	8	46	32	68	84	55.5501	66.4218
B	3	2014	2014_3	8	45	32	62	92	51.9433	73.5701
B	3	2014	2014_3	8	39	31	76	91	60.6661	72.5424
B	3	2014	2014_3	8	37.5	3.2	51	82	45.573	64.8959
B	3	2014	2014_3	8	34.5	29	74	88	59.3427	69.7321
B	3	2014	2014_3	8	30	30	55	91	47.8696	72.5424
A	3	2014	2014_3	9	30.5	14	45	76	42.1304	60.6661
A	3	2014	2014_3	9	29.5	15	53	69	46.7199	56.1668
A	3	2014	2014_3	9	21	20	58	86	49.6034	68.0272
A	3	2014	2014_3	9	22	25	53	75	46.7199	60
A	3	2014	2014_3	9	14	16	44	72	41.5539	58.0519
C	4	2012	2012_4	5	74	102	85	93	67.2135	74.6583
C	4	2012	2012_4	5	91	102	86	90	68.0272	71.5651
C	4	2012	2012_4	5	74	99	83	92	65.6499	73.5701
C	4	2012	2012_4	5	90	127	85	93	67.2135	74.6583
C	4	2012	2012_4	5	91	99	80	92	63.4349	73.5701
C	4	2012	2012_4	5	88	104	88	91	69.7321	72.5424
C	4	2012	2012_4	5	71	100	81	90	64.1581	71.5651
C	4	2012	2012_4	5	72	99	83	92	65.6499	73.5701
B	4	2012	2012_4	6	78	65	92	90.5	73.5701	72.048
B	4	2012	2012_4	6	87	52	75	76	60	60.6661
B	4	2012	2012_4	6	77	58	85	78	67.2135	62.0279
B	4	2012	2012_4	6	72	60	80	91.5	63.4349	73.0494
B	4	2012	2012_4	6	80	56	84	90	66.4218	71.5651
B	4	2012	2012_4	6	80	59	83	89	65.6499	70.6303
B	4	2012	2012_4	6	79	58	87	74	68.8657	59.3427
B	4	2012	2012_4	6	83	62	76	94	60.6661	75.8212
B	4	2012	2012_4	6	83.5	58	91.5	92.5	73.0494	74.1058
C	4	2013	2013_4	6	83.5	100	92	94	73.5701	75.8212
C	4	2013	2013_4	6	86	100	93	91	74.6583	72.5424
C	4	2013	2013_4	6	79	96	85	93	67.2135	74.6583
C	4	2013	2013_4	6	97.5	128	91	93.5	72.5424	75.2293
C	4	2013	2013_4	6	87	94	83	93	65.6499	74.6583
C	4	2013	2013_4	6	95	105	93	92	74.6583	73.5701
C	4	2013	2013_4	6	90	101	86	92.5	68.0272	74.1058
A	4	2012	2012_4	7	85	25	79	87	62.7253	68.8657
A	4	2012	2012_4	7	58	19	81	84	64.1581	66.4218
A	4	2012	2012_4	7	56	18	75	79	60	62.7253
A	4	2012	2012_4	7	45	14	77	76	61.3418	60.6661
A	4	2012	2012_4	7	50	14	84	90	66.4218	71.5651
A	4	2012	2012_4	7	54	18	82	84	64.8959	66.4218
A	4	2012	2012_4	7	55	18	81	81	64.1581	64.1581
B	4	2013	2013_4	7	74	38	84	90	66.4218	71.5651
B	4	2013	2013_4	7	78	28	80	85	63.4349	67.2135
B	4	2013	2013_4	7	78.5	40	83	91	65.6499	72.5424
B	4	2013	2013_4	7	73	41	82	92	64.8959	73.5701
B	4	2013	2013_4	7	76	33	81	90	64.1581	71.5651
B	4	2013	2013_4	7	82	31	84	91	66.4218	72.5424
B	4	2013	2013_4	7	75	35	74	89	59.3427	70.6303
C	4	2014	2014_4	7	85	80	82	90	64.8959	71.5651
C	4	2014	2014_4	7	88	81	83	87	65.6499	68.8657
C	4	2014	2014_4	7	86	84	83.5	88	66.0335	69.7321
C	4	2014	2014_4	7	88.5	83	82.5	89	65.2708	70.6303
C	4	2014	2014_4	7	90	80	84.5	90	66.8151	71.5651
C	4	2014	2014_4	7	82.5	80	85.5	88	67.6175	69.7321
C	4	2014	2014_4	7	80	91	81	90	64.1581	71.5651
C	4	2014	2014_4	7	77.5	47	83	89	65.6499	70.6303
A	4	2013	2013_4	8	59	43	80	79	63.4349	62.7253
A	4	2013	2013_4	8	63	39	75	76	60	60.6661
A	4	2013	2013_4	8	61	42	74	95	59.3427	77.079
A	4	2013	2013_4	8	52	35	84	84	66.4218	66.4218
A	4	2013	2013_4	8	56	35	80	81	63.4349	64.1581
A	4	2013	2013_4	8	58	41	79	78	62.7253	62.0279
B	4	2014	2014_4	8	84	61	74	92	59.3427	73.5701
B	4	2014	2014_4	8	87	60	83	90	65.6499	71.5651
B	4	2014	2014_4	8	80	64	85	87	67.2135	68.8657
B	4	2014	2014_4	8	85	59	81	82	64.1581	64.8959
B	4	2014	2014_4	8	82	62	86	84	68.0272	66.4218
B	4	2014	2014_4	8	87	60	78	90	62.0279	71.5651
B	4	2014	2014_4	8	71	61	83	88	65.6499	69.7321
B	4	2014	2014_4	8	79	63	85	91	67.2135	72.5424
A	4	2014	2014_4	9	59	43	82	79	64.8959	62.7253
A	4	2014	2014_4	9	59	44	76	88	60.6661	69.7321
A	4	2014	2014_4	9	64	39	76	81	60.6661	64.1581
A	4	2014	2014_4	9	54	42	83	81	65.6499	64.1581
A	4	2014	2014_4	9	55	44	83	80	65.6499	63.4349
A	4	2014	2014_4	9	65	41	81	83	64.1581	65.6499
A	4	2014	2014_4	9	61	44	76	85	60.6661	67.2135
C	5	2012	2012_5	5	33	26	92.5	94	74.1058	75.8212
C	5	2012	2012_5	5	58	23	85.5	91	67.6175	72.5424
C	5	2012	2012_5	5	28.5	23	87.5	92	69.2952	73.5701
C	5	2012	2012_5	5	31.5	30	89	90	70.6303	71.5651
C	5	2012	2012_5	5	26.5	23	89	89.5	70.6303	71.0928
C	5	2012	2012_5	5	39.5	22	85	89	67.2135	70.6303
C	5	2012	2012_5	5	32	25	88	88.5	69.7321	70.1769
C	5	2012	2012_5	5	30	25	84	91.5	66.4218	73.0494
B	5	2012	2012_5	6	32	21	86	88	68.0272	69.7321
B	5	2012	2012_5	6	34	27	75	88	60	69.7321
B	5	2012	2012_5	6	30	13	81	86	64.1581	68.0272
B	5	2012	2012_5	6	32.5	21	83	85	65.6499	67.2135
B	5	2012	2012_5	6	22	27	84	86	66.4218	68.0272
B	5	2012	2012_5	6	22	27	75	85	60	67.2135
B	5	2012	2012_5	6	26	25	74	75	59.3427	60
C	5	2013	2013_5	6	30.5	26	92	88	73.5701	69.7321
C	5	2013	2013_5	6	25.5	28	84	84	66.4218	66.4218
C	5	2013	2013_5	6	35	27	86	86	68.0272	68.0272
C	5	2013	2013_5	6	28	27	89	86	70.6303	68.0272
C	5	2013	2013_5	6	35.5	26	90	82	71.5651	64.8959
C	5	2013	2013_5	6	26	25	85	76	67.2135	60.6661
C	5	2013	2013_5	6	28.5	24	88	86	69.7321	68.0272
C	5	2013	2013_5	6	36	25	81	85	64.1581	67.2135
C	5	2013	2013_5	6	22	22	83	86	65.6499	68.0272
A	5	2012	2012_5	7	22	22	86	87	68.0272	68.8657
A	5	2012	2012_5	7	19.5	14	72	80	58.0519	63.4349
A	5	2012	2012_5	7	13	16	80	86	63.4349	68.0272
A	5	2012	2012_5	7	11	14	82	83	64.8959	65.6499
A	5	2012	2012_5	7	16	17	83	70.5	65.6499	57.1024
B	5	2013	2013_5	7	23	30	86	89	68.0272	70.6303
B	5	2013	2013_5	7	32	32	78	85.5	62.0279	67.6175
B	5	2013	2013_5	7	24	21	80	89	63.4349	70.6303
B	5	2013	2013_5	7	25	26	83	88	65.6499	69.7321
B	5	2013	2013_5	7	21.5	27	81	85.5	64.1581	67.6175
B	5	2013	2013_5	7	30	25	77	81	61.3418	64.1581
C	5	2014	2014_5	7	34.5	33	81	89.5	64.1581	71.0928
C	5	2014	2014_5	7	39.5	39	86	87	68.0272	68.8657
C	5	2014	2014_5	7	34	37	85	89	67.2135	70.6303
C	5	2014	2014_5	7	38	30	87	89	68.8657	70.6303
C	5	2014	2014_5	7	34.5	33	83	87	65.6499	68.8657
C	5	2014	2014_5	7	27.5	34	88	88	69.7321	69.7321
C	5	2014	2014_5	7	24.5	31	86	87.5	68.0272	69.2952
A	5	2013	2013_5	8	20	22	78	88	62.0279	69.7321
A	5	2013	2013_5	8	19	23	79	87	62.7253	68.8657
A	5	2013	2013_5	8	21.5	22	81	85	64.1581	67.2135
B	5	2014	2014_5	8	21	21	80	87	63.4349	68.8657
B	5	2014	2014_5	8	25	26	78	70	62.0279	56.7891
B	5	2014	2014_5	8	17	25	79	75	62.7253	60
B	5	2014	2014_5	8	17.5	23	81	85	64.1581	67.2135
A	5	2014	2014_5	9	21.5	22	83	71	65.6499	57.4173
A	5	2014	2014_5	9	22	19	81	75	64.1581	60
A	5	2014	2014_5	9	16.5	22	81	74	64.1581	59.3427
